# Supplementary material for: Insights into the reaction network and kinetics of xylose conversion over combined Lewis/Brønsted acid catalysts in a flow microreactor
Source: Royal Society of Chemistry journal article supplement (doi:10.1039/d3gc00153a), 2023-01-01
Supplement: d3gc00153a1.pdf [file d3gc00153a1.pdf]

## Supplementary Material

### **Insights into the reaction network and kinetics of xylose conversion over combined Lewis/Brønsted acid catalysts in a flow microreactor**

Wenze Guo,<sup>a, b</sup> Herman Carolus Bruining,<sup>a</sup> Hero Jan Heeres,<sup>a</sup> Jun Yue<sup>a, \*</sup>

<sup>a</sup> *Department of Chemical Engineering, Engineering and Technology Institute Groningen, University of Groningen, Nijenborgh 4, 9747 AG Groningen, The Netherlands*

<sup>b</sup> *State Key Laboratory of Chemical Engineering, Department of Chemical Engineering, East China University of Science and Technology, Shanghai 200237, PR China*

\* Corresponding author:

Jun Yue (yue.jun@rug.nl)

## Table of contents

- S1. Experimental conditions for kinetic experiments in monophasic water in microreactors
- S2. Quantification of xylulose and lyxose using a Gaussian deconvolution method
- S3. The volumetric flow rate change and ratio of the aqueous or organic phase after mixing and reaction
- S4. Quantification of aluminum species and  $H^+$  in water
- S5. Comparison of the conversion of xylose, xylulose and lyxose using HCl as the catalyst
- S6. ESI-MS spectra of the aqueous solution of xylose
- S7. Screening of reaction conditions for the conversion of xylose, lyxose, xylulose and furfural in monophasic water in the microreactor
- S8. Phase volume change and the concentrations of  $Al(OH)^{2+}$  and  $H^+$  at reaction temperature
- S9. Additional information regarding the apparent reaction rate constants
- S10. Partition coefficient of furfural between water and MIBK
- S11. Mass transfer efficiency in the slug flow microreactor
- S12. Parity plot for model predictions and experiment results
- S13. Effect of temperature on the sugar conversion over sole  $Al(OH)^{2+}$  or  $H^+$  in water
- S14. Analysis of humin sources and furfural yields
- S15. Performance of literature work on furfural synthesis from xylose and their comparison with this work

## S1. Experimental conditions for kinetic experiments in monophasic water in microreactors

Table S1. Experimental conditions for kinetic experiments in monophasic water in microreactors

| T (°C) | Catalyst                              | Starting substrate                                                                                                                                                                    |                                                             |
|--------|---------------------------------------|---------------------------------------------------------------------------------------------------------------------------------------------------------------------------------------|-------------------------------------------------------------|
| 120    | 200 mM HCl                            | 0.1 M xylose, 0.1 M lyxose, 0.01 M xylulose, 0.1 M furfural                                                                                                                           |                                                             |
|        | 40 mM AlCl <sub>3</sub>               | 0.1 M xylose, 0.1 M lyxose, 0.01 M xylulose, 0.1 M furfural                                                                                                                           |                                                             |
| 140    | 200 mM HCl                            | 0.1 M xylose, 0.1 M lyxose, 0.01 M xylulose, 0.1 M furfural                                                                                                                           |                                                             |
|        | 40 mM AlCl <sub>3</sub>               | 0.1 M xylose, 0.1 M lyxose, 0.01 M xylulose, 0.1 M furfural                                                                                                                           |                                                             |
| 160    | 40 mM AlCl <sub>3</sub>               | 0.1 M xylose, 0.3 M xylose, 0.5 M xylose, 0.1 M lyxose, 0.3 M lyxose, 0.5 M lyxose, 0.01 M xylulose, 0.03 M xylulose, 0.05 M xylulose, 0.1 M furfural, 0.3 M furfural, 0.5 M furfural |                                                             |
|        | 80 mM AlCl <sub>3</sub>               | 0.1 M xylose, 0.1 M lyxose, 0.01 M xylulose, 0.1 M furfural                                                                                                                           |                                                             |
|        | 120 mM AlCl <sub>3</sub>              | 0.1 M xylose, 0.1 M lyxose, 0.01 M xylulose, 0.1 M furfural                                                                                                                           |                                                             |
|        | 19 mM HCl                             | 0.1 M xylose, 0.1 M lyxose, 0.01 M xylulose, 0.1 M furfural                                                                                                                           |                                                             |
|        | 50 mM HCl                             | 0.1 M xylose, 0.1 M lyxose, 0.01 M xylulose, 0.1 M furfural                                                                                                                           |                                                             |
|        | 100 mM HCl                            | 0.1 M xylose                                                                                                                                                                          |                                                             |
|        | 40 mM AlCl <sub>3</sub> + 100 mM HCl  | 0.1 M xylose                                                                                                                                                                          |                                                             |
|        | 80 mM AlCl <sub>3</sub> + 100 mM HCl  | 0.1 M xylose                                                                                                                                                                          |                                                             |
|        | 120 mM AlCl <sub>3</sub> + 100 mM HCl | 0.1 M xylose                                                                                                                                                                          |                                                             |
|        | 200 mM AlCl <sub>3</sub> + 100 mM HCl | 0.1 M xylose                                                                                                                                                                          |                                                             |
|        | 200 mM HCl                            | 0.1 M xylose, 0.3 M xylose, 0.5 M xylose, 0.1 M lyxose, 0.3 M lyxose, 0.5 M lyxose, 0.01 M xylulose, 0.03 M xylulose, 0.05 M xylulose, 0.1 M furfural, 0.3 M furfural, 0.5 M furfural |                                                             |
|        | 400 mM HCl                            | 0.1 M xylose, 0.1 M lyxose, 0.01 M xylulose, 0.1 M furfural                                                                                                                           |                                                             |
|        | 180                                   | 200 mM HCl                                                                                                                                                                            | 0.1 M xylose, 0.1 M lyxose, 0.01 M xylulose, 0.1 M furfural |
|        |                                       | 40 mM AlCl <sub>3</sub>                                                                                                                                                               | 0.1 M xylose, 0.1 M lyxose, 0.01 M xylulose, 0.1 M furfural |

## S2. Quantification of xylulose and lyxose using a Gaussian deconvolution method

The retention times for xylulose and lyxose on HPLC chromatogram are 12.9 min and 13.0 min, respectively (Figure S1a). Such a similar retention time for these species leads to a severe overlap of their peaks (Figure S1b). To determine the area of the peaks of xylulose and lyxose, a Gaussian deconvolution method was applied by fixing the position of the fitted peaks of xylulose and lyxose, with the intensity of these peaks adjusted to keep the position and FWHM (full width at half maximum) of the overall fitted curve nearly identical to the experimental curve (Figure S1b). The above curving fitting process was performed on an OriginPro 8.5 Software (OriginLab Corporation). Then, the concentrations of xylulose and lyxose were calculated using the calibration equations obtained from the standard solutions of known compound with known concentrations.

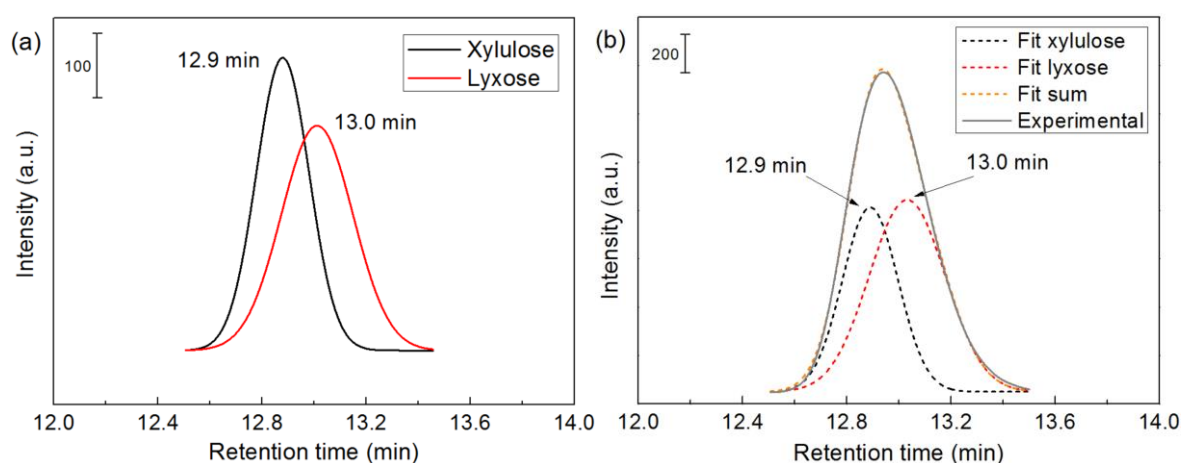

Fig. S1. (a) HPLC chromatogram of the individual standard xylulose and lyxose; (b) analysis of the compounds using deconvolution method on the HPLC chromatogram of the product sample. Reaction conditions: 0.1 M xylose, 40 mM  $\text{AlCl}_3$ , 160 °C and 2 min.

### S3. The volumetric flow rate change and ratio of the aqueous or organic phase after mixing and reaction

#### S3.1 Flow rate change and ratio between the microreactor inlet and outlet at 20 °C

Under the conditions that the aqueous phase and MIBK phase were mixed and then separated at 20 °C, the simulation results of the flow rate changes were summarized in Table S2. In the table,  $\gamma_{aq}$  or  $\gamma_{org}$  represents the ratio of the volumetric flow rates of the aqueous or organic phase between the microreactor outlet and inlet (both at ca. 20 °C). The value of this ratio was estimated using Aspen Plus simulation, the details of which has been reported in our previous work.<sup>1</sup>

Table S2. Volumetric flow rate change and ratio of the aqueous or organic phase after mixing, reaction and cooling to 20 °C according to the Aspen Plus simulation.

| Inlet volumetric flow rate ratio (MIBK : water) | $Q_{org}$ (mL/min)         |                             |                    | $Q_{aq}$ (mL/min)          |                             |                   |
|-------------------------------------------------|----------------------------|-----------------------------|--------------------|----------------------------|-----------------------------|-------------------|
|                                                 | Inlet <sup>a</sup> (20 °C) | Outlet <sup>b</sup> (20 °C) | $\gamma_{org}$ (-) | Inlet <sup>a</sup> (20 °C) | Outlet <sup>b</sup> (20 °C) | $\gamma_{aq}$ (-) |
| 4:1                                             | 400                        | 400.78                      | 1.002              | 100                        | 96.46                       | 0.965             |
| 2:1                                             | 200                        | 199.13                      | 0.996              | 100                        | 99.48                       | 0.995             |
| 1:1                                             | 100                        | 98.30                       | 0.983              | 100                        | 100.99                      | 1.010             |
| 1:2                                             | 100                        | 95.77                       | 0.958              | 200                        | 203.49                      | 1.018             |
| 1:4                                             | 100                        | 90.70                       | 0.907              | 400                        | 408.48                      | 1.021             |

<sup>a</sup> Before mixing, each phase was fed at 20 °C.

<sup>b</sup> After two-phase mixing and separation at 20 °C.

#### S3.2 Flow rate change and ratio of each phase between 20 °C and the reaction temperature (T)

Due to the temperature-dependency of the liquid density and partial miscibility between water and MIBK, the volumetric flow rate of the aqueous or organic phase changed after two-phase mixing and heating-up from 20 °C to reaction temperature (T). Such a flow rate change

was estimated by Aspen Plus Simulation as reported in our previous work.<sup>1-3</sup> The flow rate change ratio ( $\alpha_{bi,aq}$  or  $\alpha_{bi,org}$ ) was approximated as eqn 17 ( $Q_{aq} = Q_{aq,0} \alpha_{mono,aq}$ ), where the parameters are given in Table S3.

Table S3. Values of the model parameters in eqn 17.<sup>2</sup>

| Ratio             | Initial O/A <sup>a</sup> | <i>u</i> | <i>v</i> | <i>w</i> |
|-------------------|--------------------------|----------|----------|----------|
| (-)               | (-)                      | (-)      | (-)      | (-)      |
| $\alpha_{bi,aq}$  | 1                        | 0.870    | 0.129    | 0.004    |
|                   | 2                        | 0.898    | 0.092    | 0.003    |
|                   | 3                        | 0.983    | -0.001   | 0.014    |
|                   | 4                        | 1.013    | -0.040   | 0.006    |
| $\alpha_{bi,org}$ | 1                        | 0.755    | 0.205    | 0.006    |
|                   | 2                        | 0.781    | 0.193    | 0.006    |
|                   | 3                        | 0.789    | 0.188    | 0.006    |
|                   | 4                        | 0.793    | 0.187    | 0.006    |

<sup>a</sup> Before mixing, each phase was fed at 20 °C.

#### S4. Quantification of aluminum species and H<sup>+</sup> in water

AlCl<sub>3</sub> readily hydrolyzes stepwise in water to form various species such as [Al(H<sub>2</sub>O)<sub>6</sub>]<sup>3+</sup>, [Al(OH)(H<sub>2</sub>O)<sub>5</sub>]<sup>2+</sup>, [Al(OH)<sub>2</sub>(H<sub>2</sub>O)<sub>4</sub>]<sup>+</sup>, Al(OH)<sub>3</sub>, and [Al(OH)<sub>4</sub>]<sup>-</sup>, as expressed in eqn S1-S6. These aluminum species are in equilibrium with each other, of which the amount depends on the temperature (*T*), pH value (or equivalently, the HCl concentration  $C_{HCl}$ ), and AlCl<sub>3</sub> concentration ( $C_{AlCl_3}$ ).

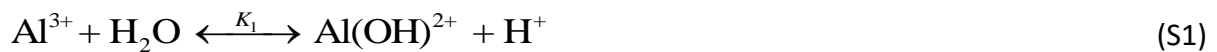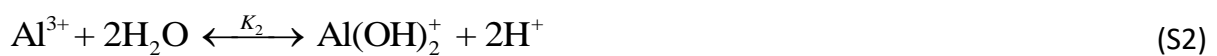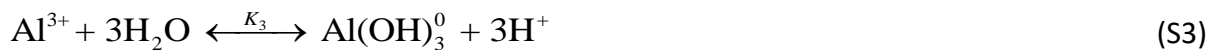

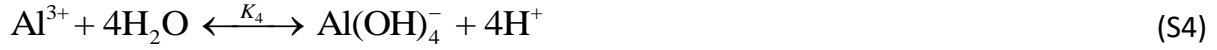

For each hydrolysis reaction mentioned above, the equilibrium constants ( $K_i$ ) are defined as

$$K_i = \frac{[\text{Al}(\text{OH})_i^{(3-i)+}][\text{H}^+]^i}{[\text{Al}]^{3+}} \quad (\text{S5})$$

where  $i = 1, 2, 3$  and  $4$ , corresponding to eqn S1-S4, respectively. The values of  $K_i$  are calculated via an empirical equation<sup>4</sup>

$$\log_{10} K_i = a + b \log_{10} T + c/T \quad (\text{S6})$$

Here,  $T$  (in K) is the temperature, and the polynomial coefficients  $a$ ,  $b$  and  $c$  for  $K_i$  are listed in Table S4.

Table S4. Polynomial coefficients for the estimation of  $K_i$  values from 0-300 °C<sup>4</sup>

| $K_i$ | $a$     | $b$      | $c$      |
|-------|---------|----------|----------|
| $K_1$ | 153.578 | 52.9073  | 5271.05  |
| $K_2$ | 78.6758 | 28.9013  | -883.083 |
| $K_3$ | 41.943  | -10.1134 | -9851.53 |
| $K_4$ | 22.3129 | 9.72248  | -7125.85 |

In aqueous system with known concentrations of  $\text{AlCl}_3$  ( $C_{\text{AlCl}_3}$ ) and  $\text{HCl}$  ( $C_{\text{HCl}}$ ), there is according to mole balances for both aluminum species and  $\text{H}^+$

$$C_{\text{AlCl}_3} = C_{\text{Al}^{3+}} + C_{\text{Al}(\text{OH})^{2+}} + C_{\text{Al}(\text{OH})_2^+} + C_{\text{Al}(\text{OH})_3^0} + C_{\text{Al}(\text{OH})_4^-} \quad (\text{S7})$$

$$C_{\text{H}^+} = C_{\text{HCl}} + C_{\text{Al}(\text{OH})^{2+}} + 2C_{\text{Al}(\text{OH})_2^+} + 3C_{\text{Al}(\text{OH})_3^0} + 4C_{\text{Al}(\text{OH})_4^-} \quad (\text{S8})$$

Therefore, for the given known reaction temperature ( $T$ ) and concentrations of  $\text{AlCl}_3$  and  $\text{HCl}$ , the concentrations of each aluminum species and  $\text{H}^+$  can be determined by combining eqn S5-S8. For example, the concentrations of  $\text{Al}(\text{OH})_2^+$  and  $\text{H}^+$  under some representative conditions are listed in Table S5 hereafter (Section S8).

## S5. Comparison of the conversion of xylose, xylulose and lyxose using HCl as the catalyst

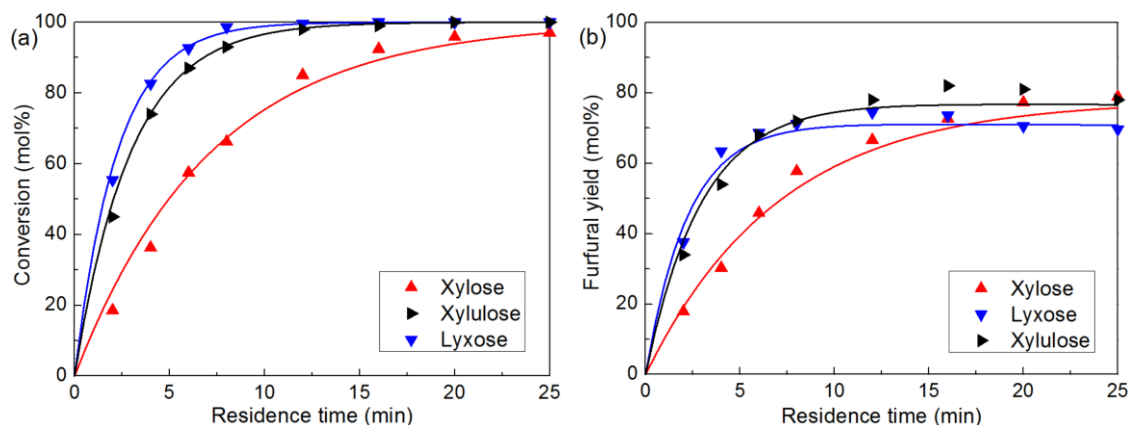

Fig. S2. (a) Sugar conversion and (b) furfural yield with different hexoses (xylose, xylulose and lyxose) as the substrate over HCl in a water-MIBK biphasic solvent system in the microreactor. Reaction conditions:  $L = 3.3$  m,  $160$  °C,  $200$  mM HCl,  $0.1$  M substrate,  $O/A = 4$ .

## S6. ESI-MS spectra of the aqueous solution of xylose

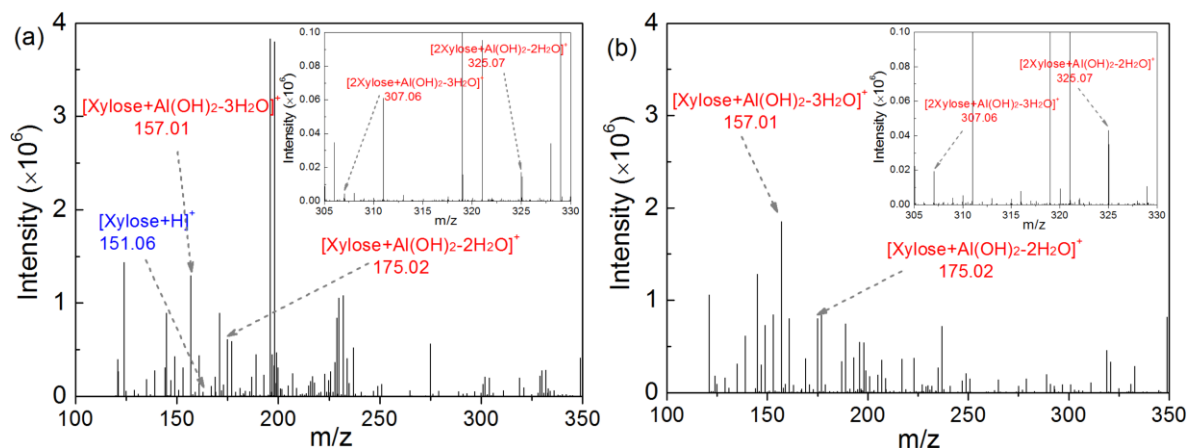

Fig. S3. ESI-MS spectra of the aqueous solution of xylose containing (a)  $200$  mM HCl and  $40$  mM  $AlCl_3$ ; and (b)  $200$  mM HCl and  $80$  mM  $AlCl_3$ . Inset in (b) shows a magnified view of  $m/z$  region at  $305$ - $330$ .



## S7. Screening of reaction conditions for the conversion of xylose, lyxose, xylulose and furfural in monophasic water in the microreactor

### S7.1 Effect of temperature

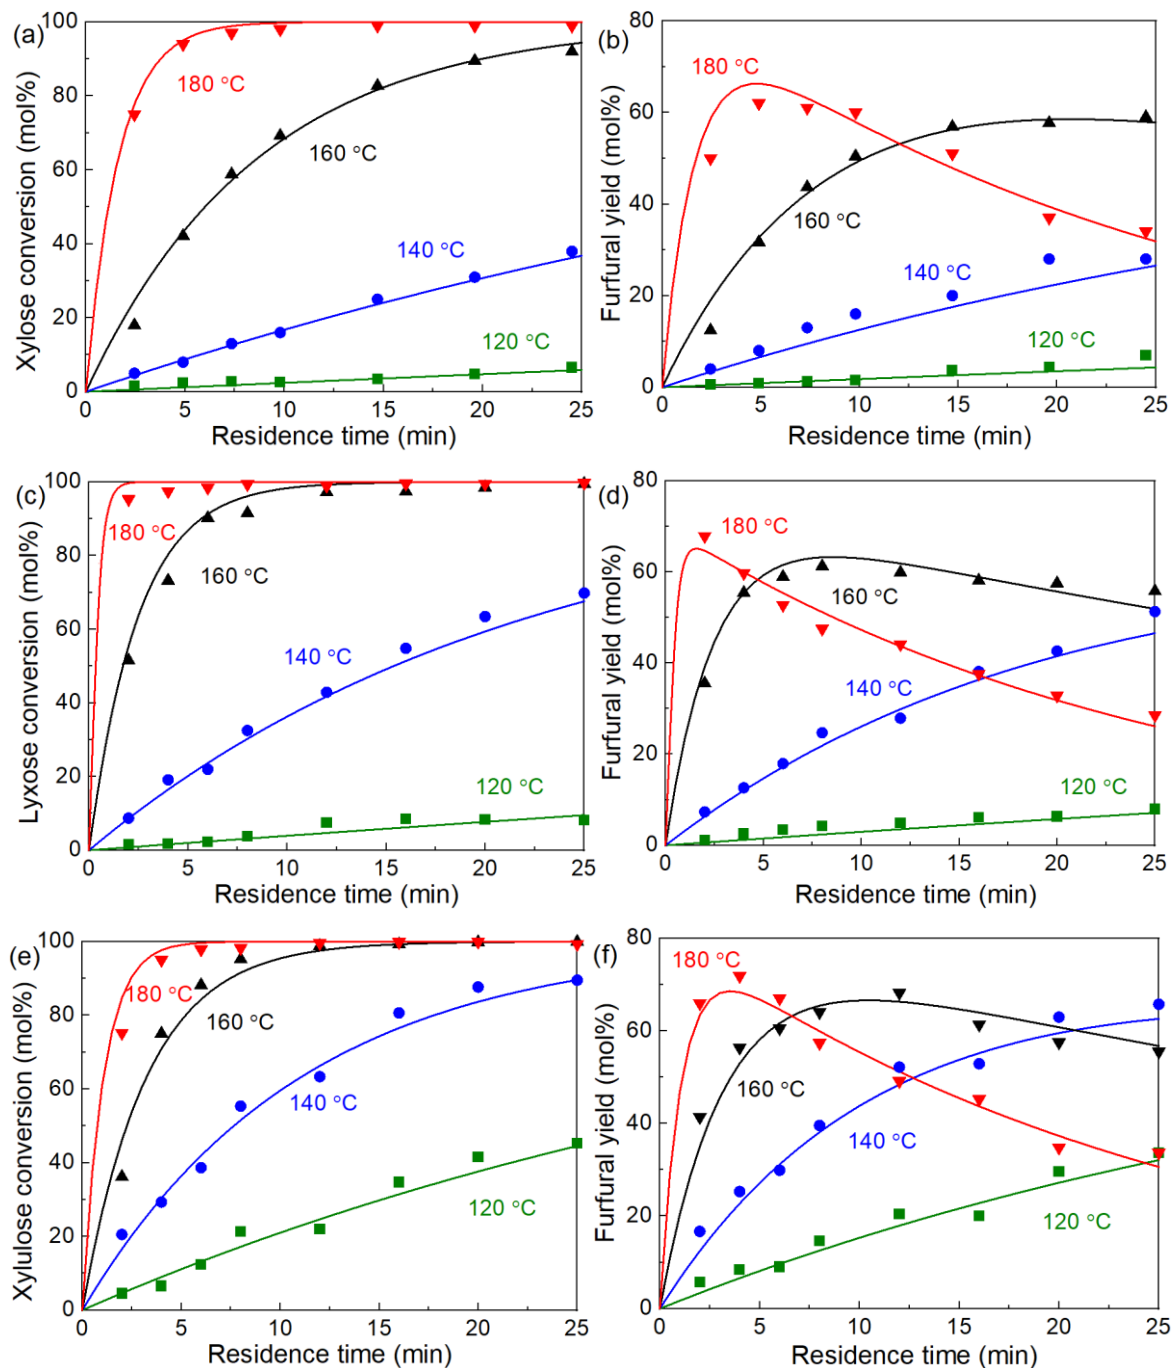

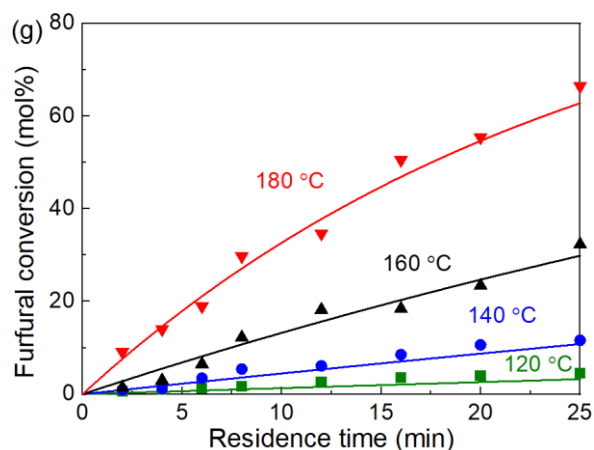

Fig. S4. Effect of temperature on the HCl-catalyzed conversion of sugars or furfural in water in the microreactor. (a) Sugar conversion and (b) furfural yield with xylose as the substrate; (c) sugar conversion and (d) furfural yield with lyxose as the substrate; (e) sugar conversion and (f) furfural yield with xylulose as the substrate; and (g) conversion of furfural as the substrate. Reaction conditions:  $L = 3.3$  m, 0.2 M HCl, substrate concentration at 0.01 M for xylulose and 0.1 M for the rest.

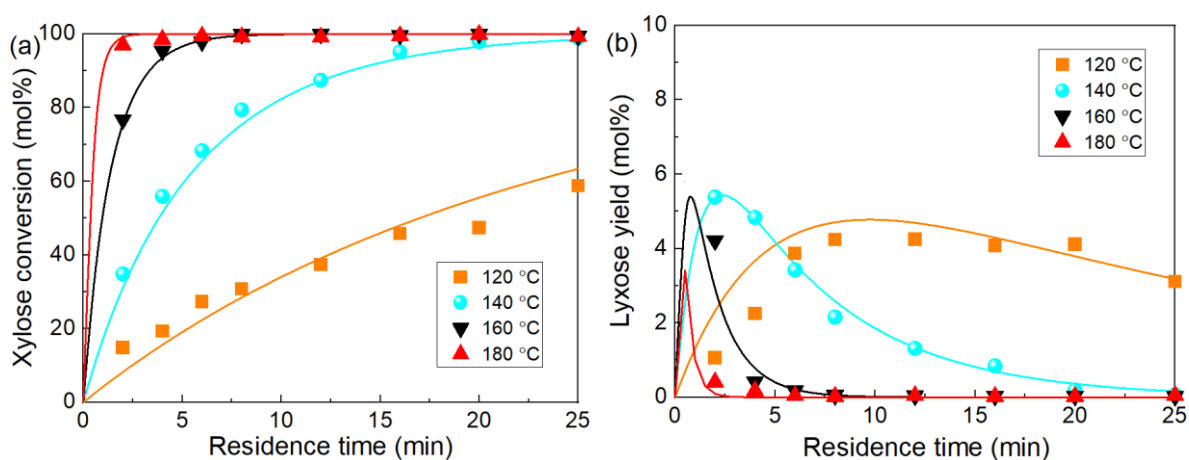

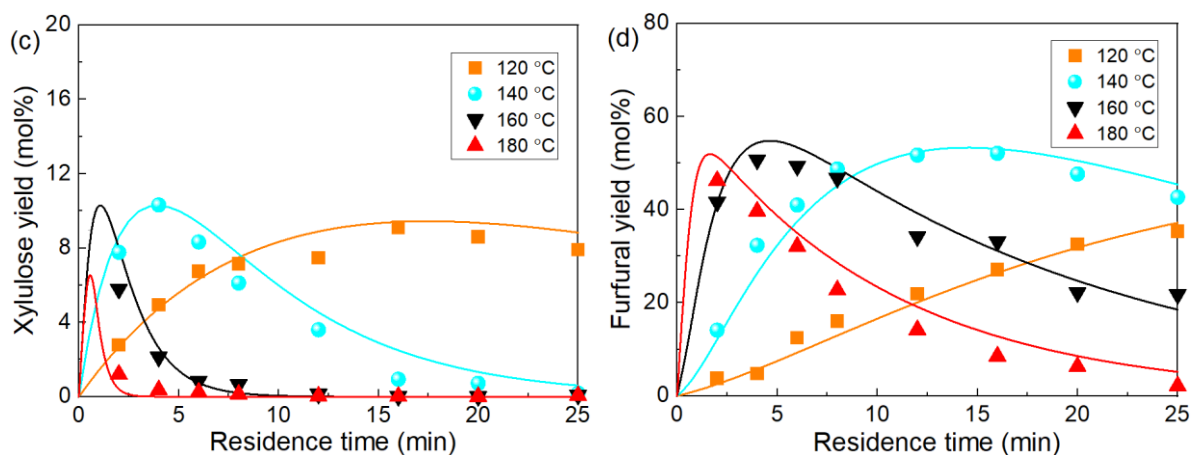

Fig. S5. Effect of temperature on the  $\text{AlCl}_3$ -catalyzed xylose conversion in water in the microreactor. (a) Xylose conversion; (b) lyxose yield; (c) xylulose yield and (d) furfural yield. Reaction conditions:  $L = 3.3$  m, 40 mM  $\text{AlCl}_3$ , 0.1 M xylose.

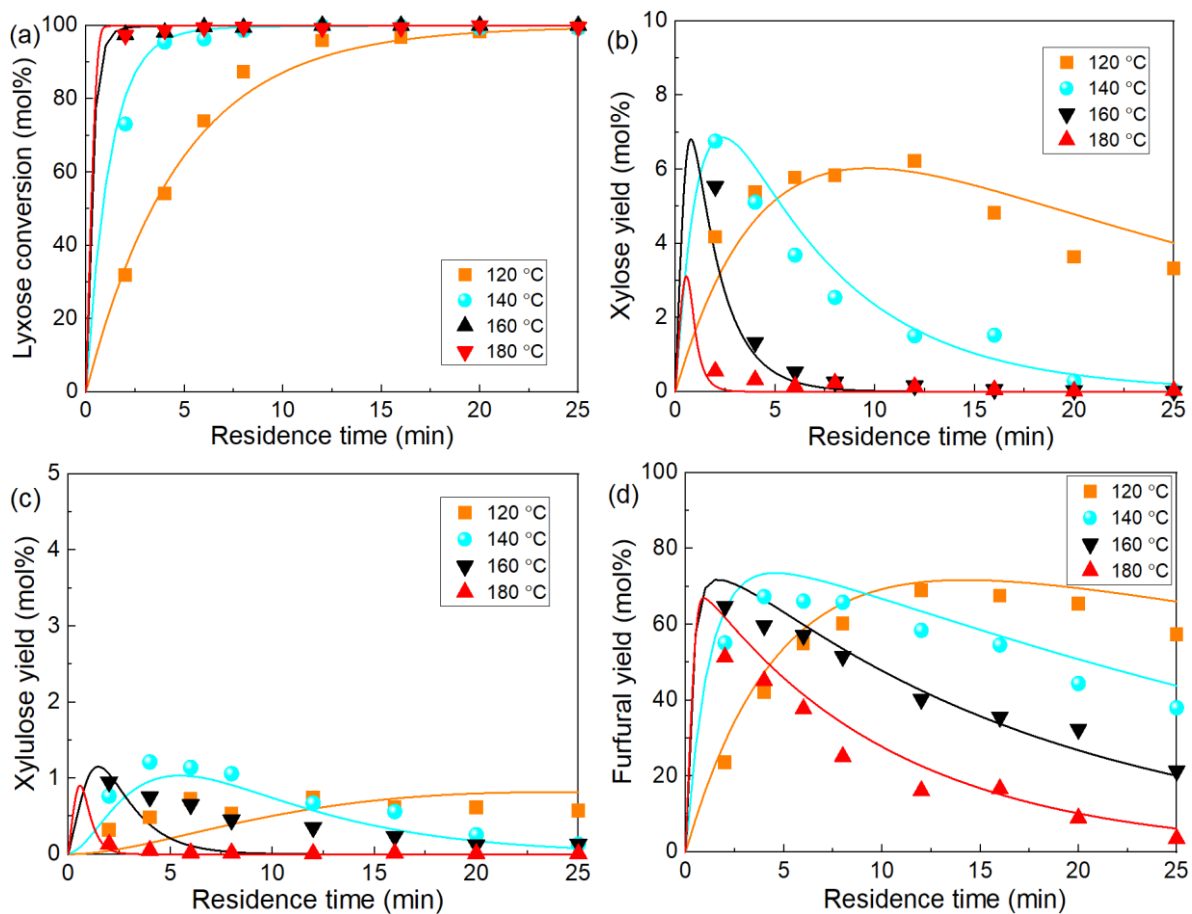

Fig. S6. Effect of temperature on the  $\text{AlCl}_3$ -catalyzed lyxose conversion in water in the microreactor. (a) Lyxose conversion; (b) xylose yield; (c) xylulose yield and (d) furfural yield. Reaction conditions:  $L = 3.3$  m, 40 mM  $\text{AlCl}_3$ , 0.1 M lyxose.

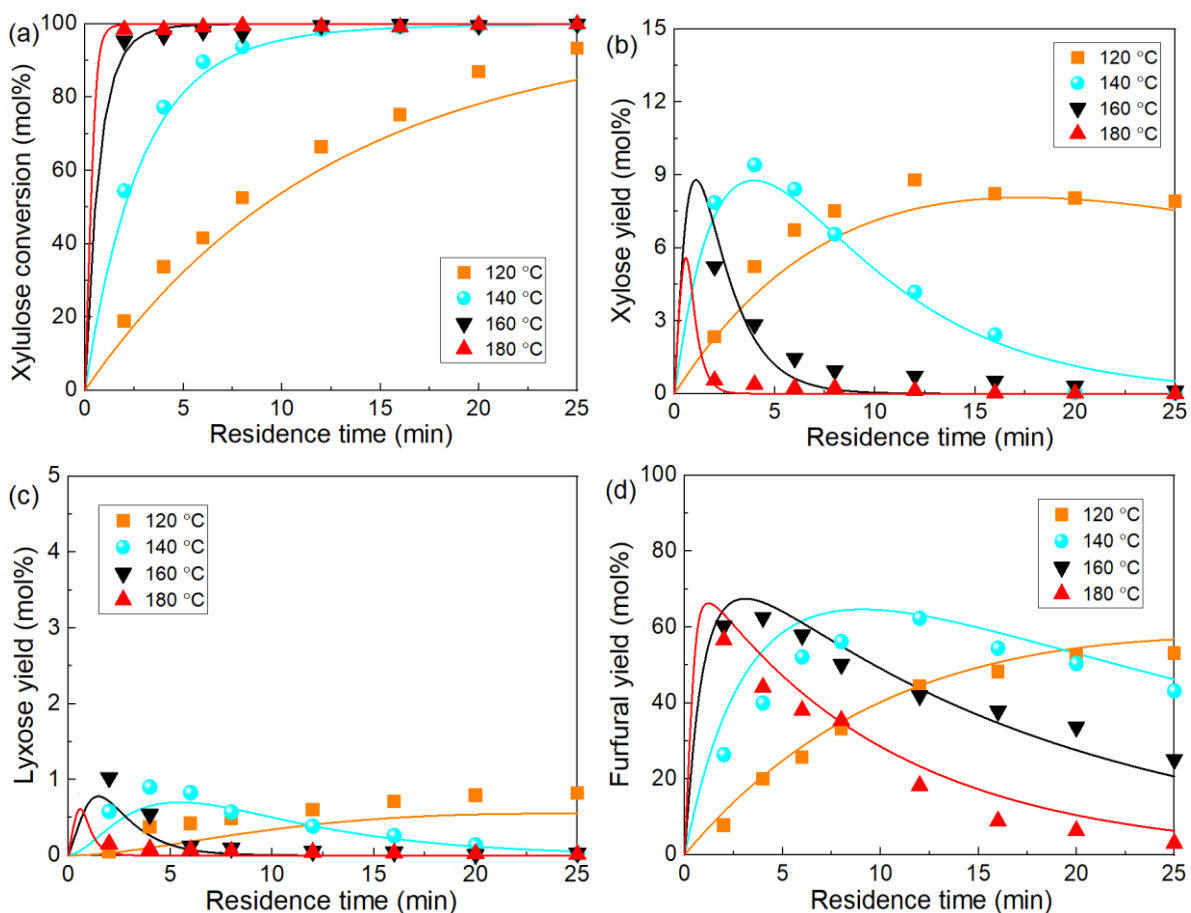

Fig. S7. Effect of temperature on the  $\text{AlCl}_3$ -catalyzed xylulose conversion in water in the microreactor. (a) xylulose conversion; (b) xylose yield; (c) lyxose yield and (d) furfural yield. Reaction conditions:  $L = 3.3$  m, 40 mM  $\text{AlCl}_3$ , 0.01 M xylulose.

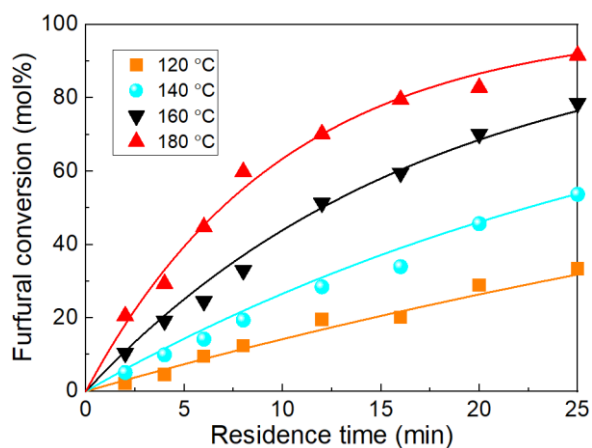

Fig. S8. Effect of temperature on the  $\text{AlCl}_3$ -catalyzed furfural conversion in water in the microreactor. Reaction conditions:  $L = 3.3$  m, 40 mM  $\text{AlCl}_3$ , 0.1 M furfural.

### S7.2 Effect of acid concentration

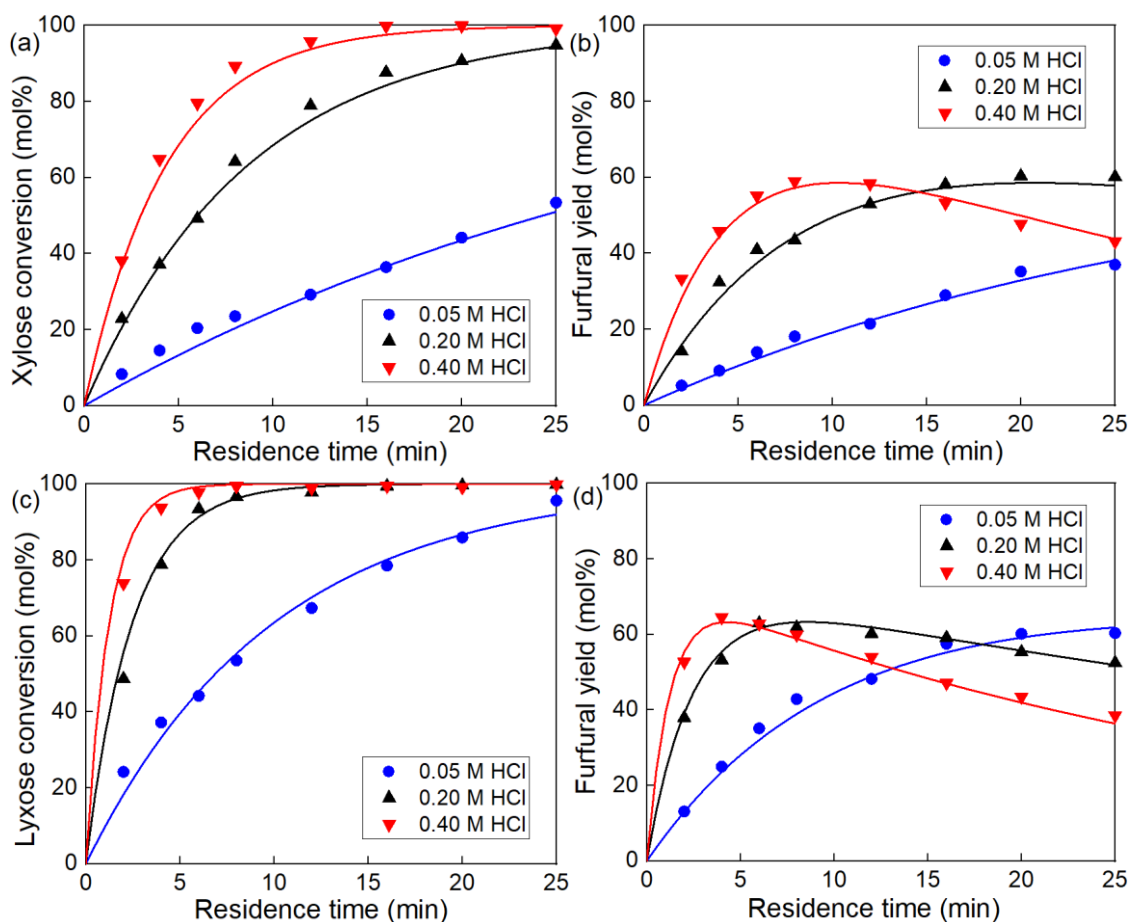

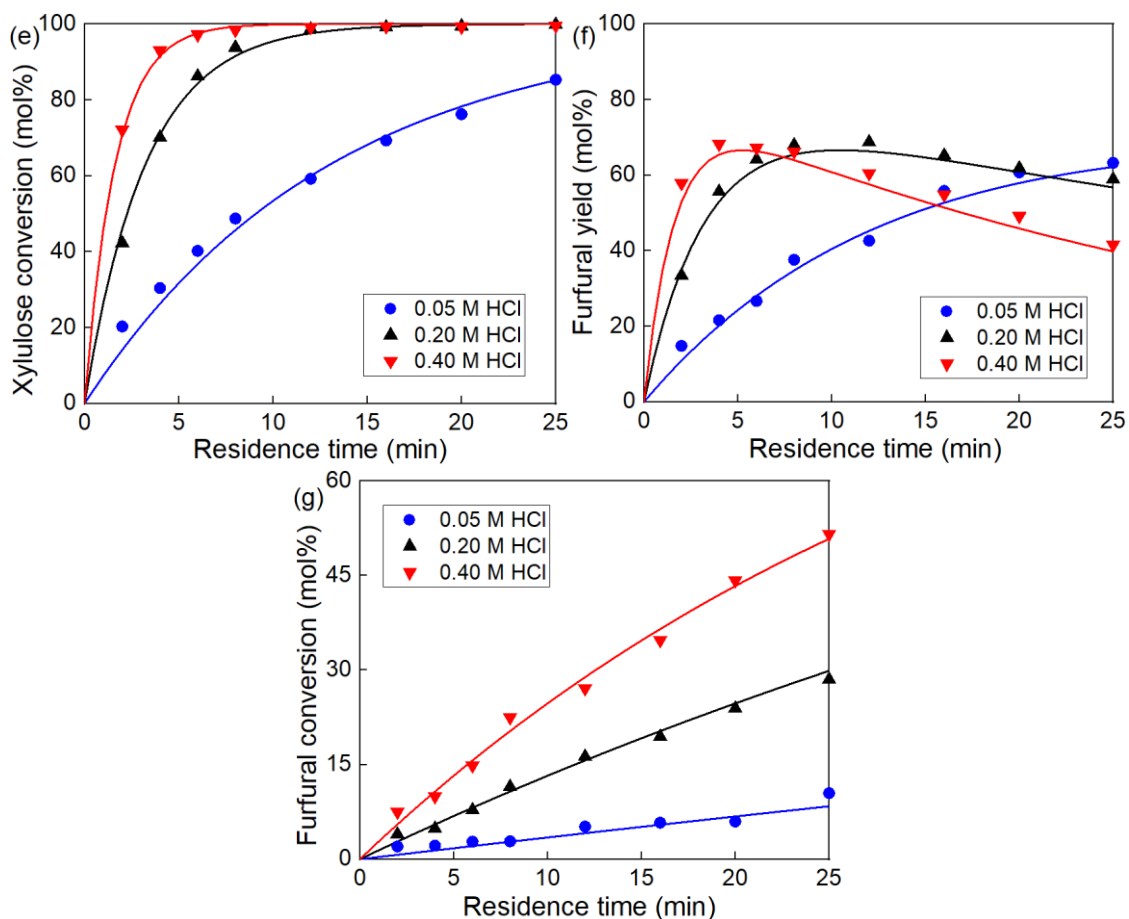

Fig. S9. Effect of acid concentration on the HCl-catalyzed conversion of sugars and furfural. . (a) Sugar conversion and (b) furfural yield with xylose as the substrate; (c) sugar conversion and (d) furfural yield with lyxose as the substrate; (e) sugar conversion and (f) furfural yield with xylulose as the substrate; and (g) conversion of furfural as the substrate. Reaction conditions:  $L = 3.3$  m,  $160$  °C, substrate concentration at  $0.01$  M for xylulose and  $0.1$  M for the rest.

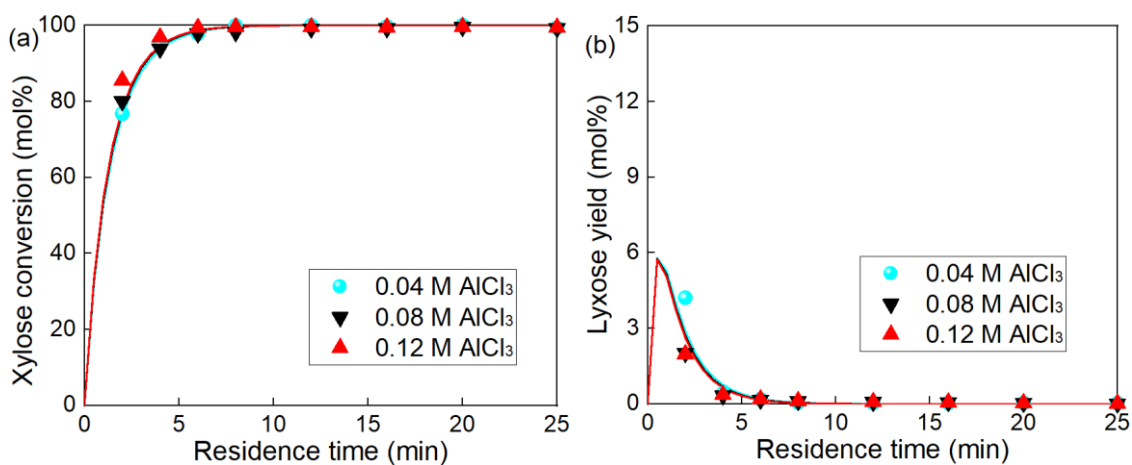

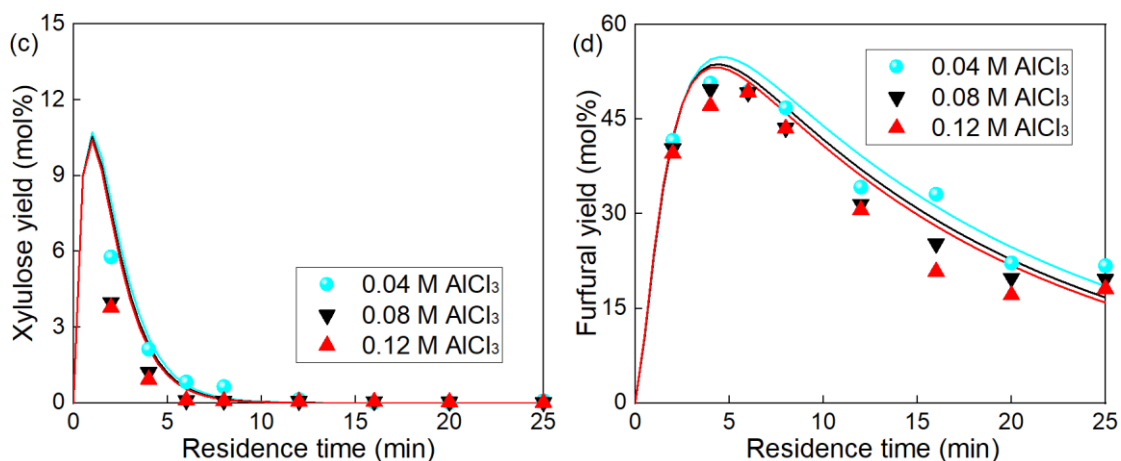

Fig. S10. Effect of acid concentration on the AlCl<sub>3</sub>-catalyzed xylose conversion. (a) Xylose conversion; (b) lyxose yield; (c) xylulose yield and (d) furfural yield. Reaction conditions:  $L = 3.3$  m, 160 °C, 0.1 M xylose.

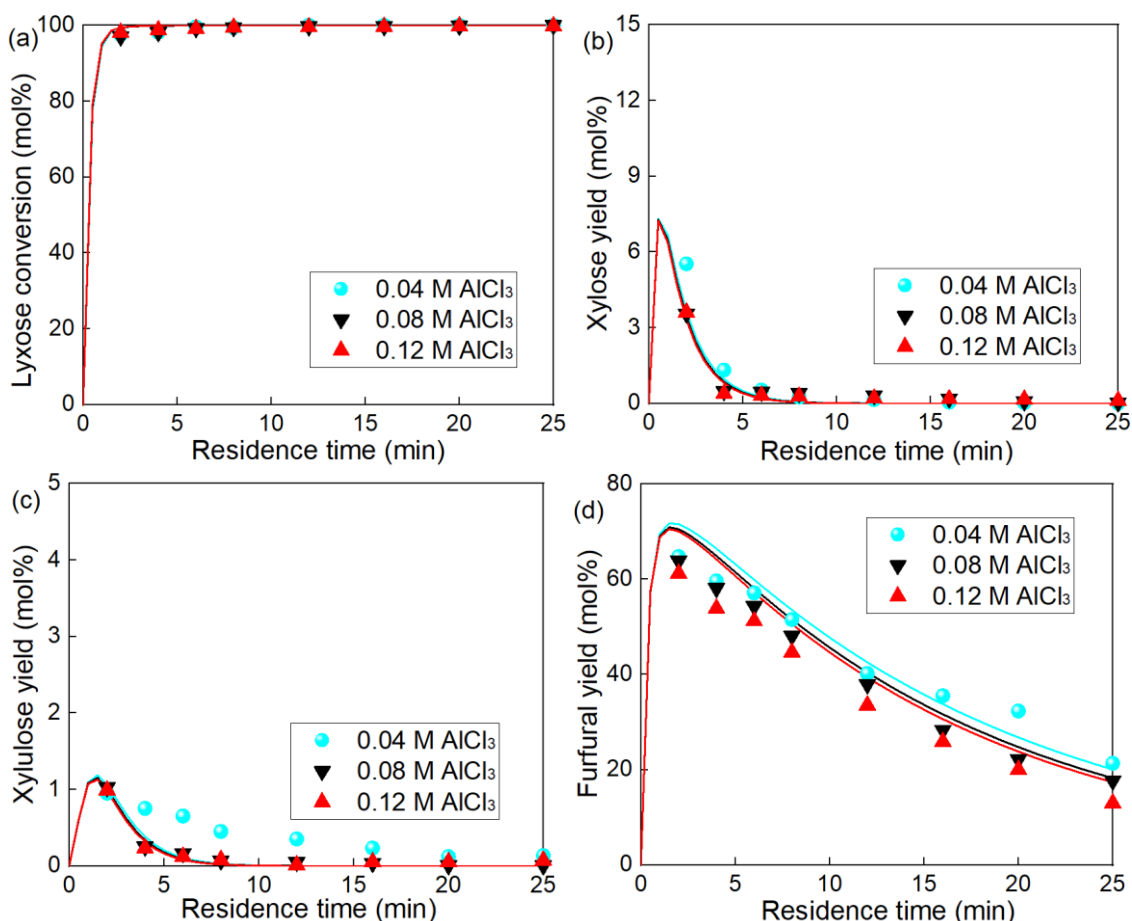

Fig. S11. Effect of acid concentration on the AlCl<sub>3</sub>-catalyzed lyxose conversion. (a) lyxose conversion; (b) xylose yield; (c) xylulose yield and (d) furfural yield. Reaction conditions:  $L = 3.3$  m, 160 °C, 0.1 M lyxose.

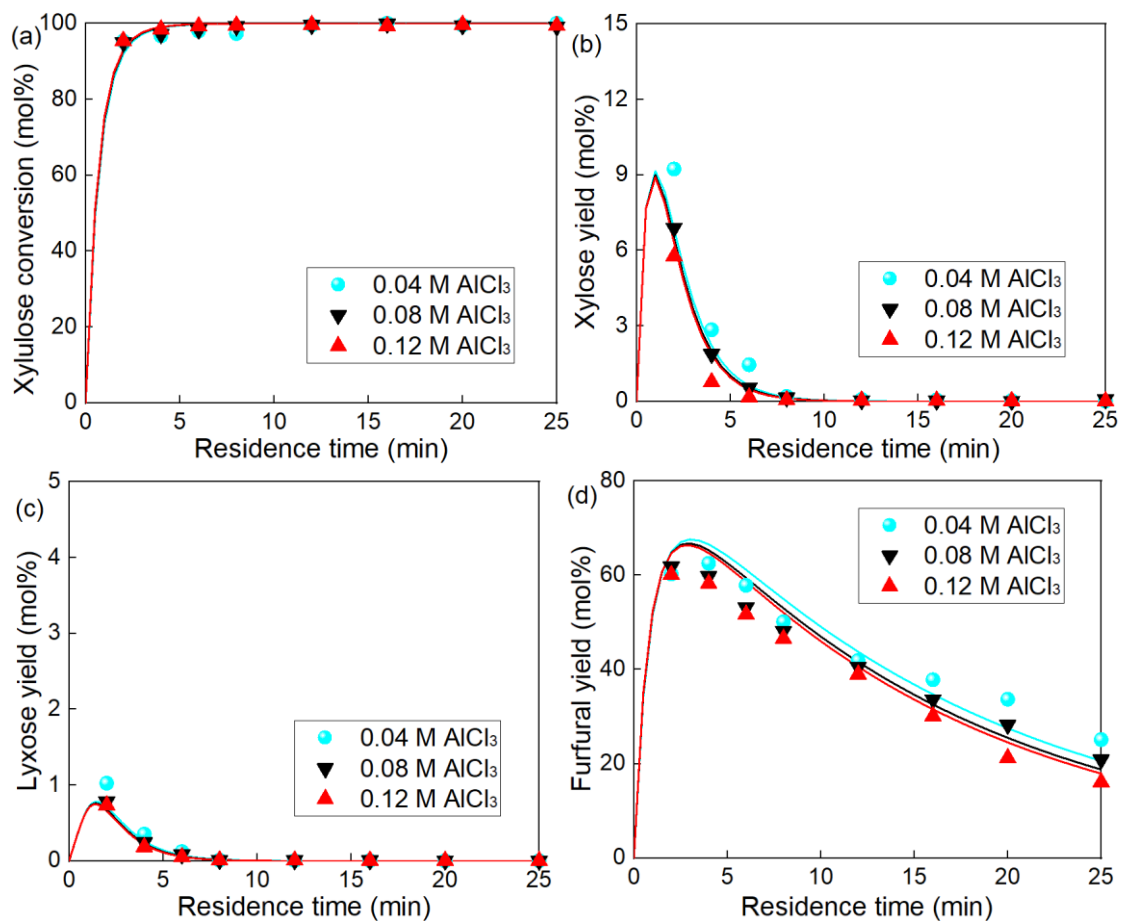

Fig. S12. Effect of acid concentration on the AlCl<sub>3</sub>-catalyzed xylulose conversion. (a) xylulose conversion; (b) xylose yield; (c) lyxose yield and (d) furfural yield. Reaction conditions:  $L = 3.3$  m,  $160\text{ }^{\circ}\text{C}$ ,  $0.01$  M lyxose.

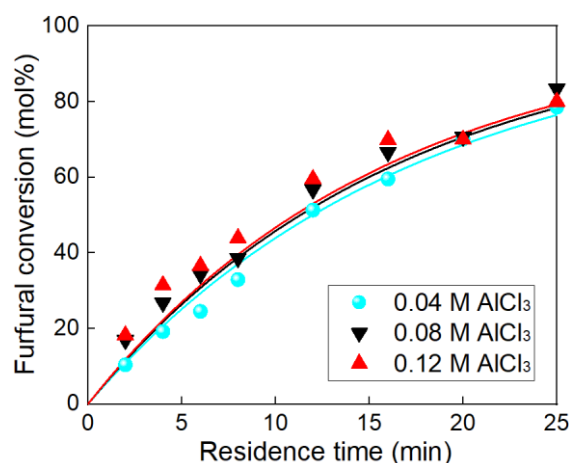

Fig. S13. Effect of acid concentration on the AlCl<sub>3</sub>-catalyzed furfural conversion. Reaction conditions:  $L = 3.3$  m,  $160\text{ }^{\circ}\text{C}$ ,  $0.1$  M furfural.



### S7.3 Effect of substrate concentration

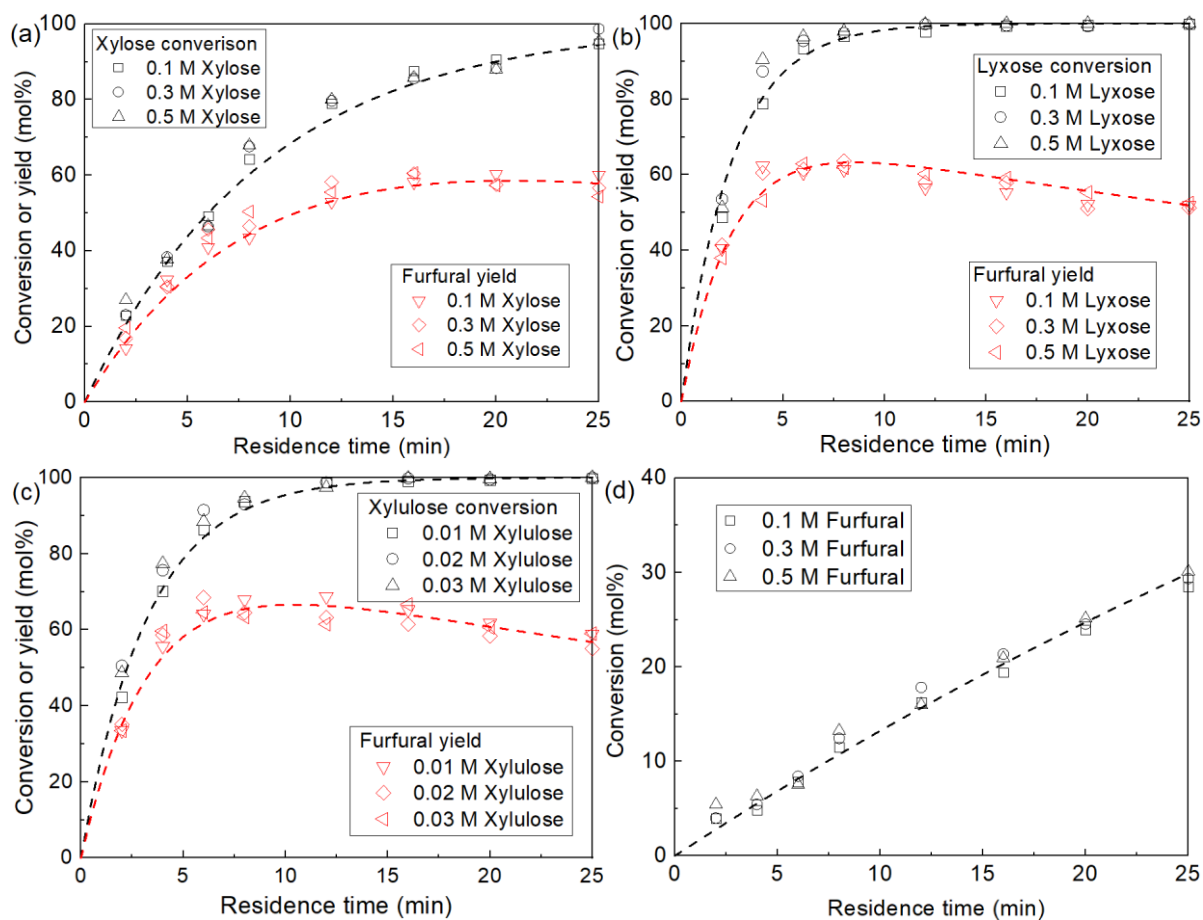

Figure S14. Effect of substrate concentration on the conversion of (a) xylose; (b) lyxose; (c) xylulose; and (d) furfural over HCl with different initial concentrations in monophasic water.

Reaction conditions: 200 mM HCl, 160 °C.

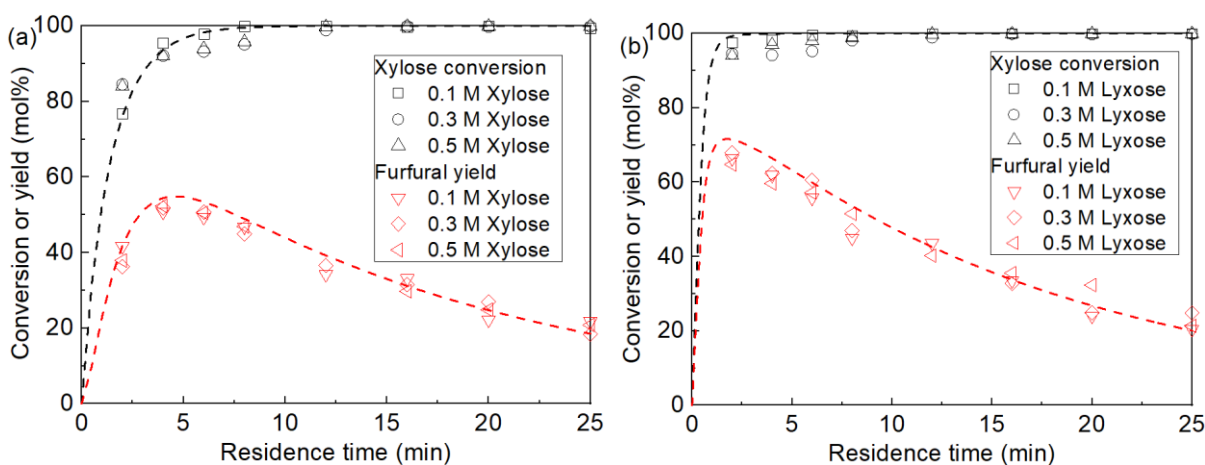

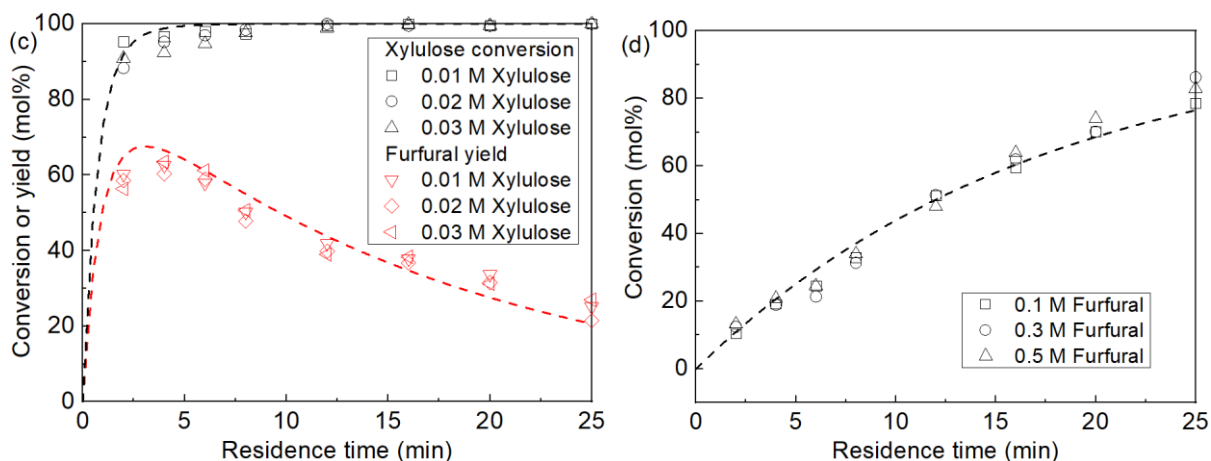

Figure S15. Effect of substrate concentration on the conversion of (a) xylose; (b) lyxose; (c) xylulose; and (d) furfural over  $\text{AlCl}_3$  with different initial concentrations in monophasic water. Reaction conditions: 40 mM  $\text{AlCl}_3$ , 160 °C.

### S7.3 Effect of $\text{AlCl}_3/\text{HCl}$ molar ratio

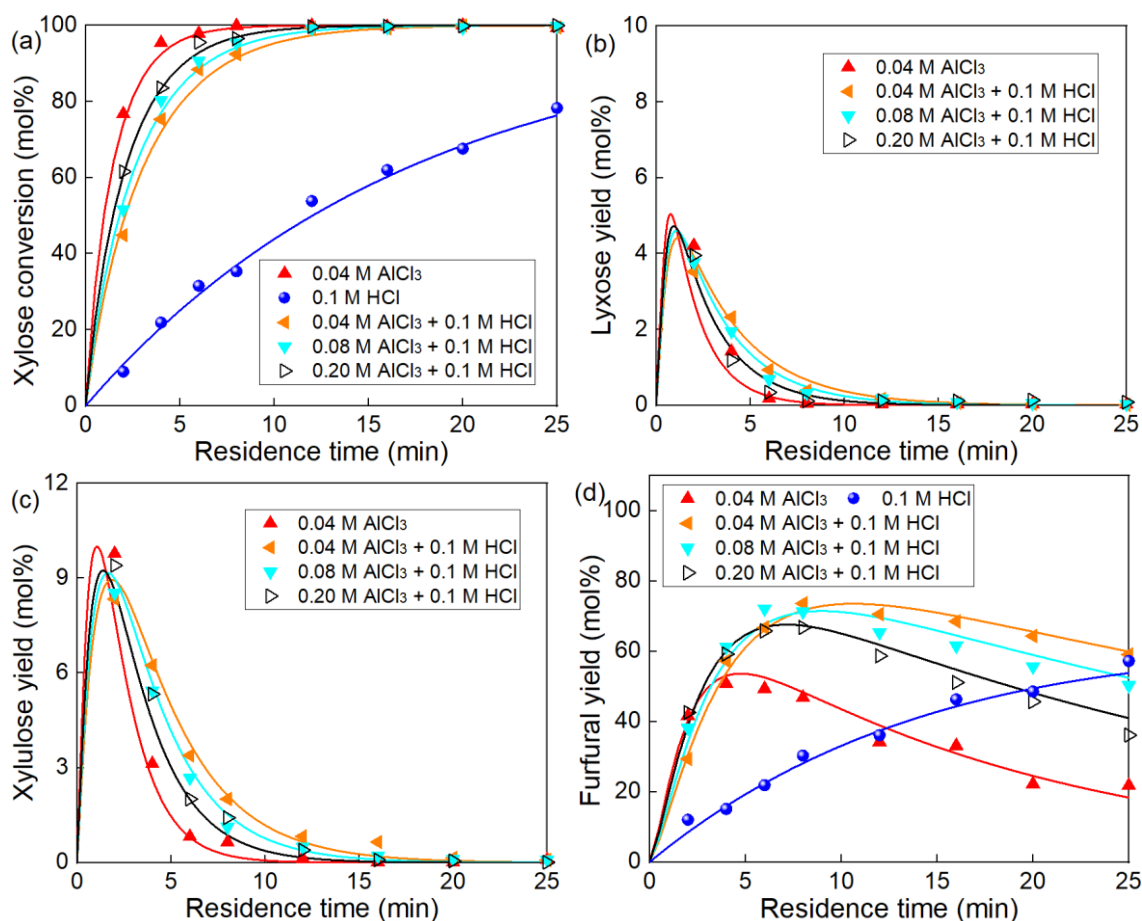

Fig. S16. Effect of  $\text{AlCl}_3/\text{HCl}$  molar ratio on (a) xylose conversion and yields of (b) lyxose, (c) xylulose and (d) furfural. Reaction conditions: 160 °C, 0.1 M xylose, monophasic water.

### S8. Phase volume change and the concentrations of Al(OH)<sub>2</sub><sup>+</sup> and H<sup>+</sup> at reaction temperature

Table S5. Phase volume change and the concentrations of Al(OH)<sub>2</sub><sup>+</sup> and H<sup>+</sup> under some representative conditions.

| No. | Initial concentration |     | T <sup>a</sup><br>(°C) | Volume change |                           | Initial<br>O/A <sup>b</sup> | Actual<br>O/A <sup>c</sup>               | Actual concentration at reaction |       |        |       |
|-----|-----------------------|-----|------------------------|---------------|---------------------------|-----------------------------|------------------------------------------|----------------------------------|-------|--------|-------|
|     | at 20 °C (mM)         |     |                        | ratio         |                           |                             |                                          | temperature T (mM)               |       |        |       |
|     | AlCl <sub>3</sub>     | HCl | Aq                     | Org           | AlCl <sub>3</sub><br>(mM) | HCl<br>(mM)                 | Al(OH) <sub>2</sub> <sup>+</sup><br>(mM) | H <sup>+</sup><br>(mM)           |       |        |       |
| 1   | 40                    | 0   | 120                    | 1.065         | -                         | 0                           | 0                                        | 37.6                             | 0     | 0.72   | 7.1   |
| 2   | 40                    | 0   | 140                    | 1.086         | -                         | 0                           | 0                                        | 36.8                             | 0     | 1.23   | 11.7  |
| 3   | 40                    | 0   | 160                    | 1.111         | -                         | 0                           | 0                                        | 36.0                             | 0     | 1.93   | 19.0  |
| 4   | 40                    | 0   | 180                    | 1.140         | -                         | 0                           | 0                                        | 35.1                             | 0     | 2.72   | 25.6  |
| 5   | 80                    | 0   | 160                    | 1.111         | -                         | 0                           | 0                                        | 72.7                             | 0     | 2.10   | 26.7  |
| 6   | 120                   | 0   | 160                    | 1.111         | -                         | 0                           | 0                                        | 109.1                            | 0     | 2.18   | 33.3  |
| 7   | 40                    | 100 | 120                    | 1.065         | -                         | 0                           | 0                                        | 37.6                             | 112.7 | 0.0048 | 94.4  |
| 8   | 40                    | 100 | 140                    | 1.086         | -                         | 0                           | 0                                        | 36.8                             | 110.5 | 0.0252 | 93.6  |
| 9   | 40                    | 100 | 160                    | 1.111         | -                         | 0                           | 0                                        | 36.0                             | 108.0 | 0.1102 | 94.4  |
| 10  | 40                    | 100 | 180                    | 1.140         | -                         | 0                           | 0                                        | 35.1                             | 105.3 | 0.3554 | 98.3  |
| 11  | 40                    | 100 | 160                    | 1.115         | 1.290                     | 1                           | 1.2                                      | 35.9                             | 107.7 | 0.1105 | 94.1  |
| 12  | 40                    | 100 | 160                    | 1.047         | 1.285                     | 2                           | 2.5                                      | 38.2                             | 114.6 | 0.1051 | 99.9  |
| 13  | 40                    | 100 | 160                    | 0.974         | 1.280                     | 3                           | 3.9                                      | 41.1                             | 123.3 | 0.0990 | 107.1 |
| 14  | 40                    | 100 | 160                    | 0.909         | 1.281                     | 4                           | 5.6                                      | 44.0                             | 132.1 | 0.0935 | 114.5 |
| 15  | 40                    | 100 | 160                    | 0.488         | 1.322                     | 8                           | 21.7                                     | 82.0                             | 204.9 | 0.0545 | 209.6 |
| 16  | 40                    | 100 | 120                    | 0.931         | 1.177                     | 4                           | 5.1                                      | 43.0                             | 128.9 | 0.0042 | 107.9 |
| 17  | 40                    | 100 | 140                    | 0.920         | 1.226                     | 4                           | 5.3                                      | 43.5                             | 130.4 | 0.0216 | 110.2 |
| 18  | 40                    | 100 | 180                    | 0.895         | 1.344                     | 4                           | 6.0                                      | 44.7                             | 134.0 | 0.3076 | 123.0 |

<sup>a</sup> Reaction temperature; <sup>b</sup> Before mixing and reaction, each phase was fed at 20 °C; <sup>c</sup> After mixing at the reaction temperature and the corresponding saturated vapour pressure.

### S9. Additional information regarding the apparent reaction rate constants

Apparent reaction rate constants for the sub-reactions catalyzed by either  $\text{H}^+$  ( $k_{\text{B}, ij}^{\text{app}}$ ) or  $\text{Al}(\text{OH})_2^+$  ( $k_{\text{L}, ij}^{\text{app}}$ ) are defined as the product of intrinsic reaction rate constant ( $k_{\text{B}, ij}$  or  $k_{\text{L}, ij}$ ) and the corresponding catalyst concentration to a power of reaction order ( $n$ ), and the reaction rates expressions are simplified accordingly, as shown in Table S6.

Table S6. Definition of the apparent reaction rate constants and reaction rates for the sub-reactions within xylose conversion network.

| <i>ij</i> | Reaction                        | Reaction rates                                                     | Definition of the apparent rate constants                   |                                                      |
|-----------|---------------------------------|--------------------------------------------------------------------|-------------------------------------------------------------|------------------------------------------------------|
|           |                                 |                                                                    | Lewis acid [Al(OH) <sub>2</sub> ] <sup>+</sup>              | Brønsted acid H <sup>+</sup>                         |
| 1X        | Xylose to lyxose <sup>a</sup>   | $R_{1X} = k_{L, 1X}^{app} C_{aq, Xylose}$                          | $k_{L, 1X}^{app} = k_{L, 1X} C_{Al(OH)_2^+}^{n_{L, 1X}}$    | -                                                    |
| 2X        | Xylose to xylulose <sup>a</sup> | $R_{2X} = k_{L, 2X}^{app} C_{aq, Xylose}$                          | $k_{L, 2X}^{app} = k_{L, 2X} C_{Al(OH)_2^+}^{n_{L, 2X}}$    | -                                                    |
| 3X        | Xylose to furfural              | $R_{3X} = (k_{L, 3X}^{app} + k_{B, 3X}^{app}) C_{aq, Xylose}$      | $k_{L, 3X}^{app} = k_{L, 3X} C_{Al(OH)_2^+}^{n_{L, 3X}}$    | $k_{B, 3X}^{app} = k_{B, 3X} C_{H^+}^{n_{B, 3X}}$    |
| 4X        | Xylose to humins                | $R_{4X} = (k_{L, 4X}^{app} + k_{B, 4X}^{app}) C_{aq, Xylose}$      | $k_{L, 4X}^{app} = k_{L, 4X} C_{Al(OH)_2^+}^{n_{L, 4X}}$    | $k_{B, 4X}^{app} = k_{B, 4X} C_{H^+}^{n_{B, 4X}}$    |
| 2L        | Lyxose to furfural              | $R_{2L} = (k_{L, 2L}^{app} + k_{B, 2L}^{app}) C_{aq, Lyxose}$      | $k_{L, 2L}^{app} = k_{L, 2L} C_{Al(OH)_2^+}^{n_{L, 2L}}$    | $k_{B, 2L}^{app} = k_{B, 2L} C_{H^+}^{n_{B, 2L}}$    |
| 3L        | Lyxose to humins                | $R_{3L} = (k_{L, 3L}^{app} + k_{B, 3L}^{app}) C_{aq, Lyxose}$      | $k_{L, 3L}^{app} = k_{L, 3L} C_{Al(OH)_2^+}^{n_{L, 3L}}$    | $k_{B, 3L}^{app} = k_{B, 3L} C_{H^+}^{n_{B, 3L}}$    |
| 2Xu       | Xylulose to furfural            | $R_{2Xu} = (k_{L, 2Xu}^{app} + k_{B, 2Xu}^{app}) C_{aq, Xylulose}$ | $k_{L, 2Xu}^{app} = k_{L, 2Xu} C_{Al(OH)_2^+}^{n_{L, 2Xu}}$ | $k_{B, 2Xu}^{app} = k_{B, 2Xu} C_{H^+}^{n_{B, 2Xu}}$ |
| 3Xu       | Xylulose to humins              | $R_{3Xu} = (k_{L, 3Xu}^{app} + k_{B, 3Xu}^{app}) C_{aq, Xylulose}$ | $k_{L, 3Xu}^{app} = k_{L, 3Xu} C_{Al(OH)_2^+}^{n_{L, 3Xu}}$ | $k_{B, 3Xu}^{app} = k_{B, 3Xu} C_{H^+}^{n_{B, 3Xu}}$ |
| 1F        | Furfural to humins              | $R_{1F} = (k_{L, 1F}^{app} + k_{B, 1F}^{app}) C_{aq, Furfural}$    | $k_{L, 1F}^{app} = k_{L, 1F} C_{Al(OH)_2^+}^{n_{L, 1F}}$    | $k_{B, 1F}^{app} = k_{B, 1F} C_{H^+}^{n_{B, 1F}}$    |

<sup>a</sup> Corresponding reversible reactions ( $R_{1L}$  and  $R_{1Xu}$ ) were modeled using equilibrium constants calculated from literature<sup>5</sup> (cf. eqn 17, 18 and Table S5).

Table S7. Equilibrium constants for xylose isomerization and epimerization

| Reaction                          | Temperature (°C) | $K^a$ (-) |
|-----------------------------------|------------------|-----------|
| Xylose $\leftrightarrow$ Xylulose | 120              | 0.7448    |
|                                   | 140              | 0.9439    |
|                                   | 160              | 1.1704    |
|                                   | 180              | 1.4239    |
| Xylose $\leftrightarrow$ Lyxose   | 120              | 0.7278    |
|                                   | 140              | 0.7608    |
|                                   | 160              | 0.7922    |
|                                   | 180              | 0.8218    |

<sup>a</sup> Equilibrium constants, which are calculated from the kinetic parameters reported in literature<sup>5</sup>.

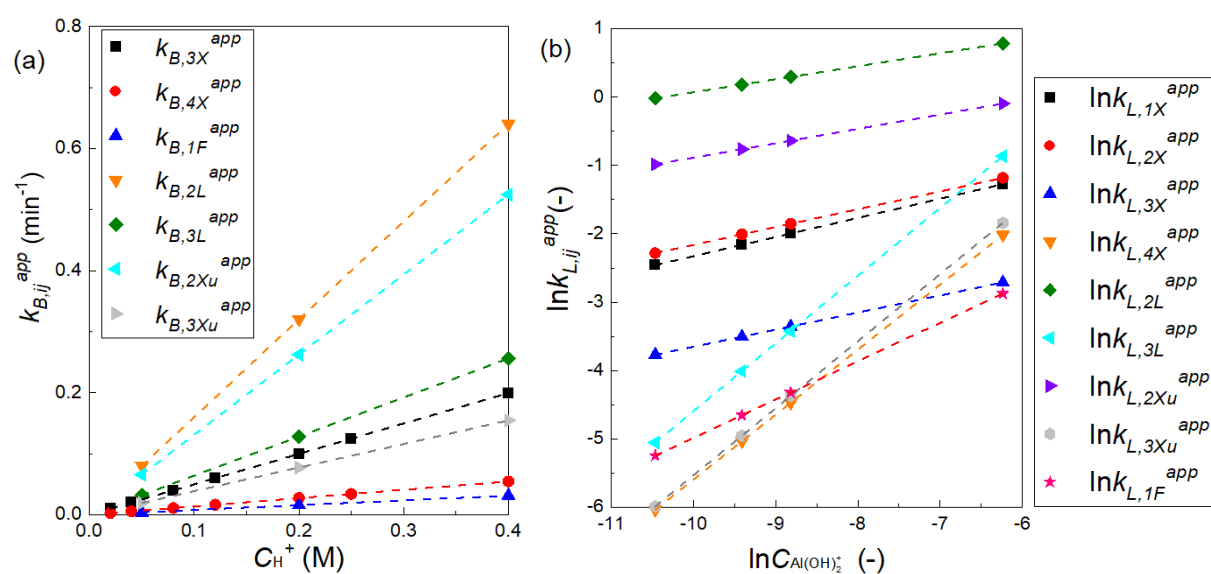

Figure S17. The experimentally determined apparent reaction rate constants for reactions starting from xylose, lyxose, xylulose and furfural versus the concentrations of (a) H<sup>+</sup> and (b) Al(OH)<sub>2</sub><sup>+</sup>. Reaction conditions: 0.1 M substrate, 160 °C, monophasic water.

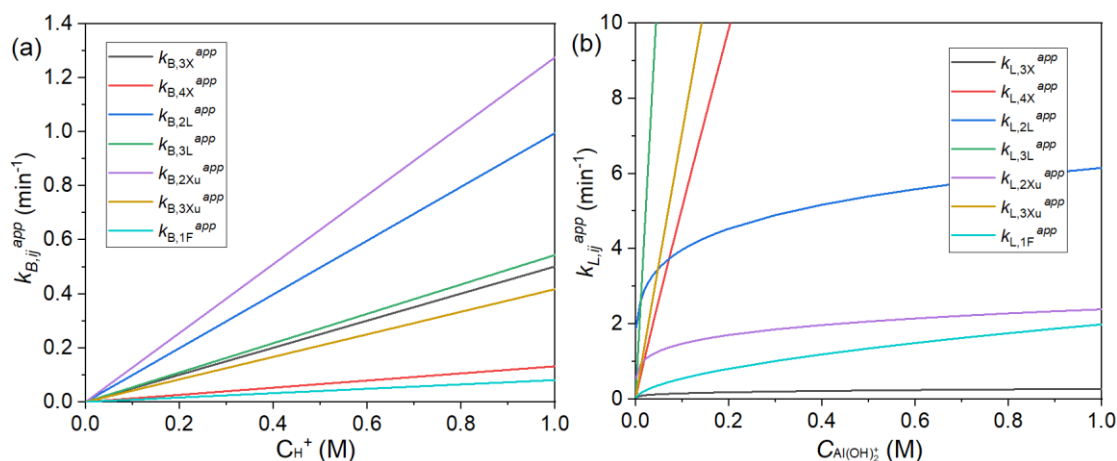

Figure S18. The modeled apparent reaction rate constants (160 °C) for the sub-reactions versus the concentrations of (a)  $H^+$  and (b)  $Al(OH)_2^+$ .

### S10. Partition coefficient of furfural between water and MIBK

Equilibrium furfural concentration was measured in modified pressure tubes (Ace Glass Inc.). Briefly, 1 mL of the aqueous phase containing 0.1 M furfural and 1 mL of MIBK were added into the tube, followed by sealing and heating in an oil bath at a set temperature under stirring at 800 rpm for 2 h to reach equilibrium. The actual reaction temperature was monitored by a calibrated thermocouple inserted into the sealed tube. Afterwards, ca. 0.5 mL of the aqueous or organic phase was sampled from the tube at the reaction temperature. The collected sample was cooled (to 20 °C) and analyzed with HPLC for the aqueous phase or GC for the organic phase (cf. Section 2.3).

The partition coefficient of furfural at the reaction temperature was defined as

$$m = \frac{C_{\text{org, furfural, eq}}}{C_{\text{aq, furfural, eq}}} \quad (\text{S9})$$

where  $C_{\text{org, furfural, eq}}$  and  $C_{\text{aq, furfural, eq}}$  are the respective equilibrium furfural concentrations in organic and aqueous phase at the reaction temperature. It should be noted that due to the volume change after cooling of the samples before analysis, the actual furfural concentration at the reaction temperature differs from the measured concentrations at 20 °C, which should be corrected by taking this volume change into account for the calculation of the partition coefficient (cf. details in our previous work<sup>2,3</sup>).

Fig. S18 shows the measured  $m$  values at different reaction temperatures, which can be well fitted using the following linear regression equation

$$m = a - bT \quad (S10)$$

where  $a = 10.137$ ,  $b = 0.0154$ , and  $T$  is in  $^{\circ}\text{C}$ .

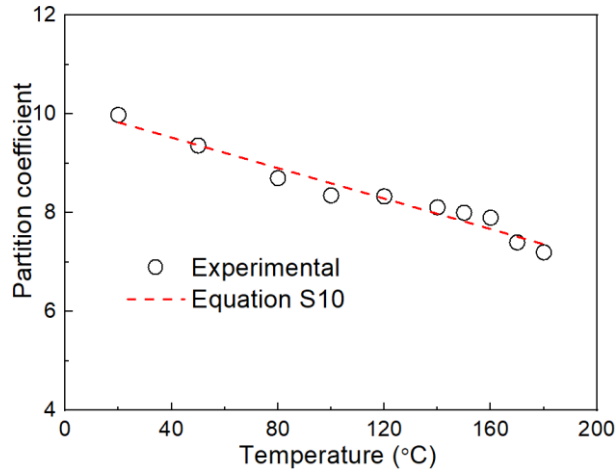

Fig. S19. Partition coefficient of furfural between water and MIBK as a function of the reaction temperature.

### S11. Mass transfer efficiency in the slug flow microreactor

For a given extraction  $O/A$  and  $m$  in the biphasic system, the mass transfer efficiency is dependent on the mass transfer coefficient ( $K_L a$ ). Under the slug flow operation in microreactors, furfural is transferred from aqueous droplets to organic slugs through (i) the caps of the droplets and (ii) the MIBK film between the droplet and reactor wall. To estimate the mass transfer coefficient, it is crucial to understand the extraction pathways and their significance. The contribution of each pathway is reflected on the Fourier number ( $FO$ ), which is defined as the ratio of the contact time of the aqueous droplet with the surrounding organic film, to the time for film saturation.

$$FO = \frac{L_{film} D_{org}}{U_{slug} \delta_{film}^2} \quad (S11)$$



where  $L_{film}$  is the film length (measured in Fig. S19a).  $D_{org}$  is the diffusivity of furfural in MIBK phase.  $U_{slug}$  is the superficial velocity of the slugs.  $\delta_{film}$  is the film thickness, which can be estimated from the following semi-empirical relation<sup>6</sup>

$$\frac{\delta_{film}}{d_c} = \frac{0.66Ca^{2/3}}{1+0.33Ca^{2/3}} \quad (S12)$$

where  $d_c$  is the inner diameter of microreactor tube.  $Ca$  is the capillary number defined by

$$Ca = \frac{\mu_{MIBK} U_{slug}}{\sigma_{water-MIBK}} \quad (S13)$$

where  $\mu_{MIBK}$  is the dynamic viscosity of the continuous phase MIBK, and  $\sigma_{water-MIBK}$  is the interfacial tension between water and MIBK.

For all experiments, the calculated film thickness  $\delta_{film}$  ranges from 0.98 to 11.8  $\mu\text{m}$ , and  $Fo$  ranges from 1.16 to  $7.4 \times 10^3$ . Such large  $Fo$  number indicates a fast saturation of the thin film due to the long contact time. Therefore, the dominant pathway for furfural mass transfer is through the caps of the droplets, and the mass transfer coefficient  $K_L$  can be estimated from<sup>7</sup>

$$K_L = \frac{1}{\frac{1}{\frac{2\sqrt{2}}{\pi} \sqrt{\frac{D_{aq} U_{slug}}{d_c}}} + \frac{1}{m \frac{2\sqrt{2}}{\pi} \sqrt{\frac{D_{org} U_{slug}}{d_c}}}} \quad (S14)$$

where  $D_{aq}$  is the diffusion coefficients of furfural in aqueous phase.

The values of all the physical properties mentioned in the above equations can be found in our previous work.<sup>3</sup>

The specific interfacial area of the cap region was calculated according to the slug flow image in Fig. S19a. The lengths of droplet, slug and cap (denoted as  $L_D$ ,  $L_S$  and  $L_{cap}$ ,

respectively) were measured. The cap is assumed to be of the oblate spheroid shape with three elliptic radii being approximated as  $d_C/2$ ,  $d_C/2$ , and  $L_{\text{cap}}$  (Fig. S19a). Thus, there is

$$a_{\text{cap}} = \frac{\frac{\pi}{2} d_C^2 + \pi \frac{L_{\text{cap}}^2}{e} \ln\left(\frac{1+e}{1-e}\right)}{\frac{\pi}{4} d_C^2 (L_D + L_S)} \quad (\text{S15})$$

where,  $e$  is the ellipticity of the oblate spheroid and defined as

$$e = \sqrt{\left(\frac{d_C^2}{4}\right) - L_{\text{cap}}^2} / \frac{d_C}{2} \quad (\text{S16})$$

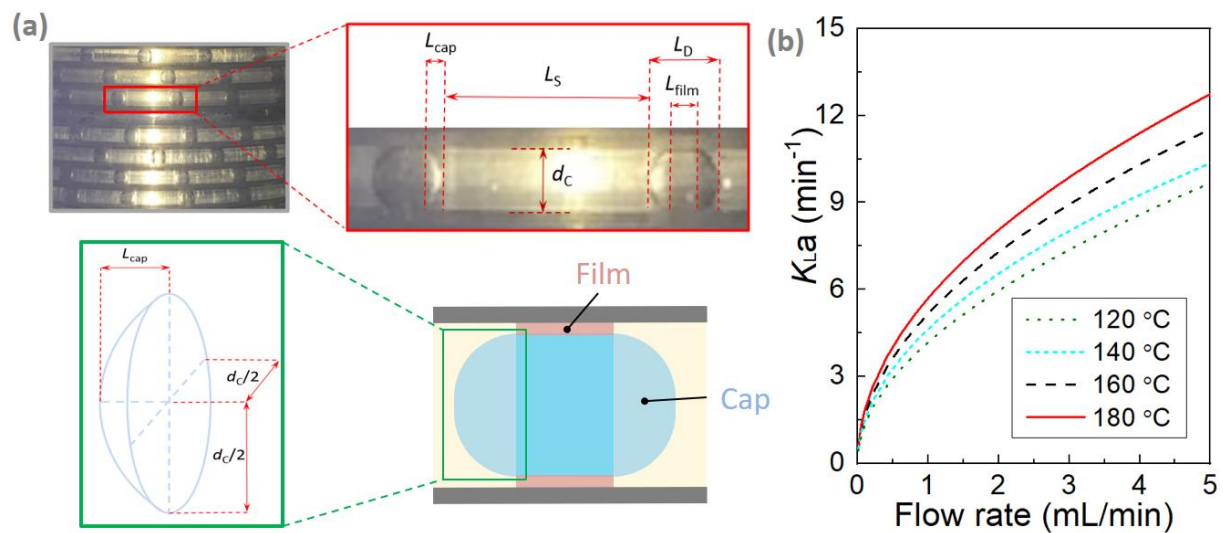

Fig. S20. (a) Imagine of the slug flow in the present PFA microreactor ( $O/A = 4$ ); (b) Estimated mass transfer coefficients as a function of the flow rate at the microreactor inlet (water-MIBK biphasic system,  $O/A = 4$ ).

The calculated mass transfer coefficient  $K_{L,a}$  is presented in Fig. S19b. Apparently,  $K_{L,a}$  is a strong function of the flow rate, as higher superficial velocity enhances the inner circulation in the droplets and slugs, and thus largely promotes the furfural extraction rates. Increase of temperature leads to higher  $K_{L,a}$ , due to the higher diffusivity of furfural in water and MIBK at higher temperature.

The calculation results (Fig. S20b) and literature suggest that higher flow rates (or equivalently, higher droplet/slug velocity) lead to higher mass transfer coefficients, as a result of the enhanced inner circulation in the droplets and slugs.<sup>8-10</sup> As such, a higher furfural yield is expected in longer microreactors if the mass transfer limitation is present. Here, the xylose reactions were performed in microreactors of different lengths (1.2, 3.3 and 16.9 m) to investigate the mass transfer efficiency under slug flow. Different flow rates were applied to maintain the same residence time for the different microreactor lengths, and the corresponding  $k_L a$  were calculated as displayed in Fig. S21a. Generally, longer microreactors give higher  $k_L a$ , and all the calculated  $k_L a$  values are two order of magnitude greater than the apparent rate constant of furfural degradation ( $k_{L,1F}^{app} = 0.0092 \text{ min}^{-1}$  and  $k_{L,1B}^{app} = 0.011 \text{ min}^{-1}$  at 160 °C with 40 mM  $\text{AlCl}_3$  and 200 mM HCl). Furthermore, the reaction results in Figs. S21 b and c show minor differences in xylose conversion and furfural yield among different reactor lengths. Consequently, both the calculation and experimental results indicate that the interfacial mass transfer resistance was largely eliminated and the reaction was performed predominantly in the kinetic regime.

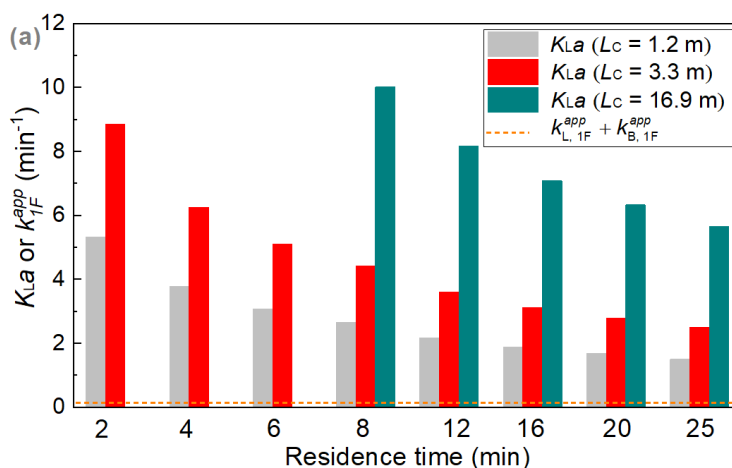

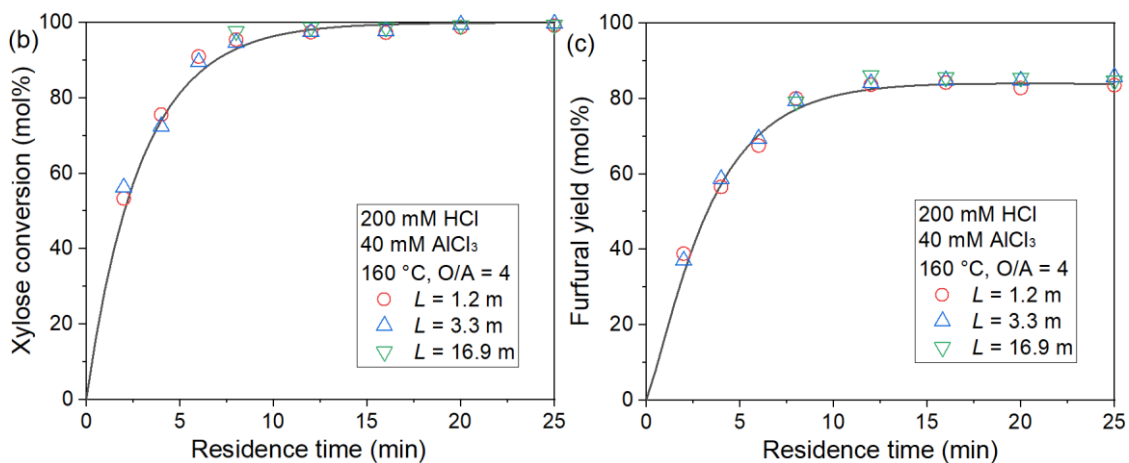

Fig. S21. (a) the estimated mass transfer coefficient; (b) xylose conversion and (c) furfural yield as a function of residence time in the slug flow microreactor with different lengths. Conditions: 160 °C, 40 mM AlCl<sub>3</sub>, 200 mM HCl, O/A = 4.

## S12. Parity plot for model predictions and experiment results

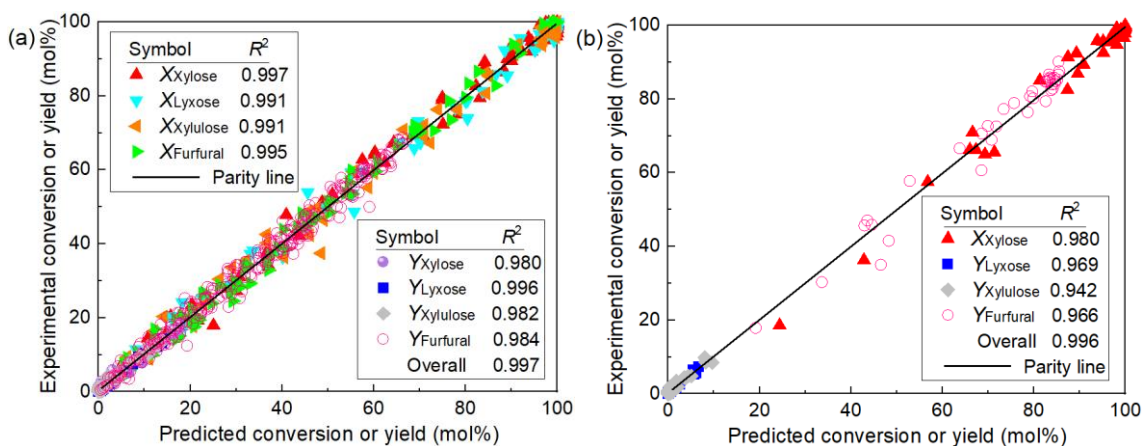

Fig. S22. Parity plots for the model predications and experimental results for the conversion and yield of all components in (a) monophasic water and (b) biphasic water-MIBK solvent system in the microreactor.

### S13. Effect of temperature on the sugar conversion over sole $\text{Al}(\text{OH})_2^+$ or $\text{H}^+$ in water

To study the effect of temperature on the individual  $\text{H}^+$ -catalyzed and  $[\text{Al}(\text{OH})_2]^+$ -catalyzed reactions, the conversion of xylose and the corresponding product yields as function of residence time at varying temperatures were modelled based on the developed kinetic model.

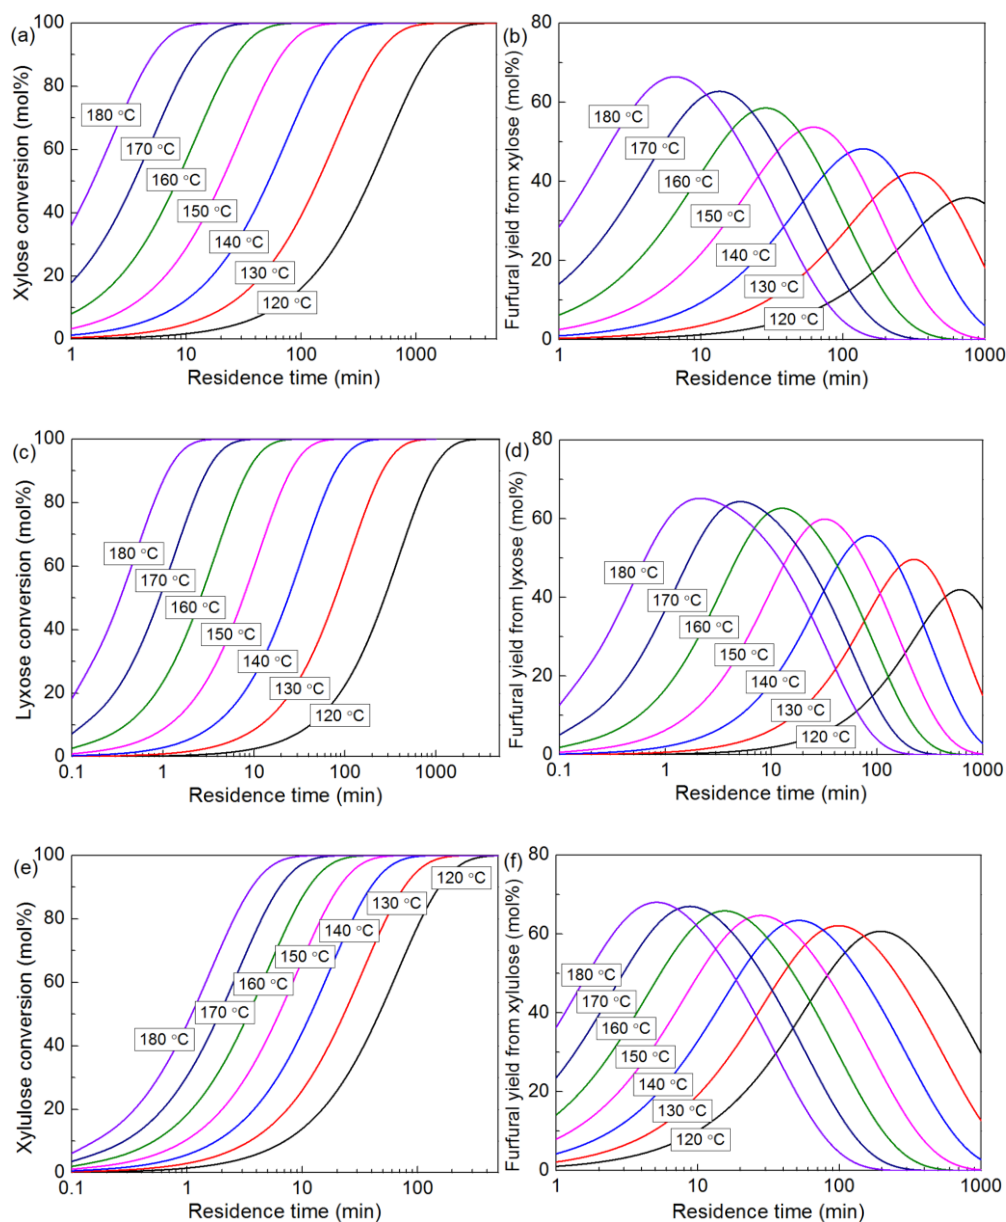

Figure S23. Effect of temperature on the  $\text{H}^+$ -catalyzed (a) xylose conversion and (b) furfural yield from xylose; (c) lyxose conversion and (d) furfural yield from lyxose; and (e) xylulose conversion and (f) furfural yield from xylulose. Reaction conditions: 0.12 M  $\text{H}^+$ , 0.5 M substrate, monophasic water.

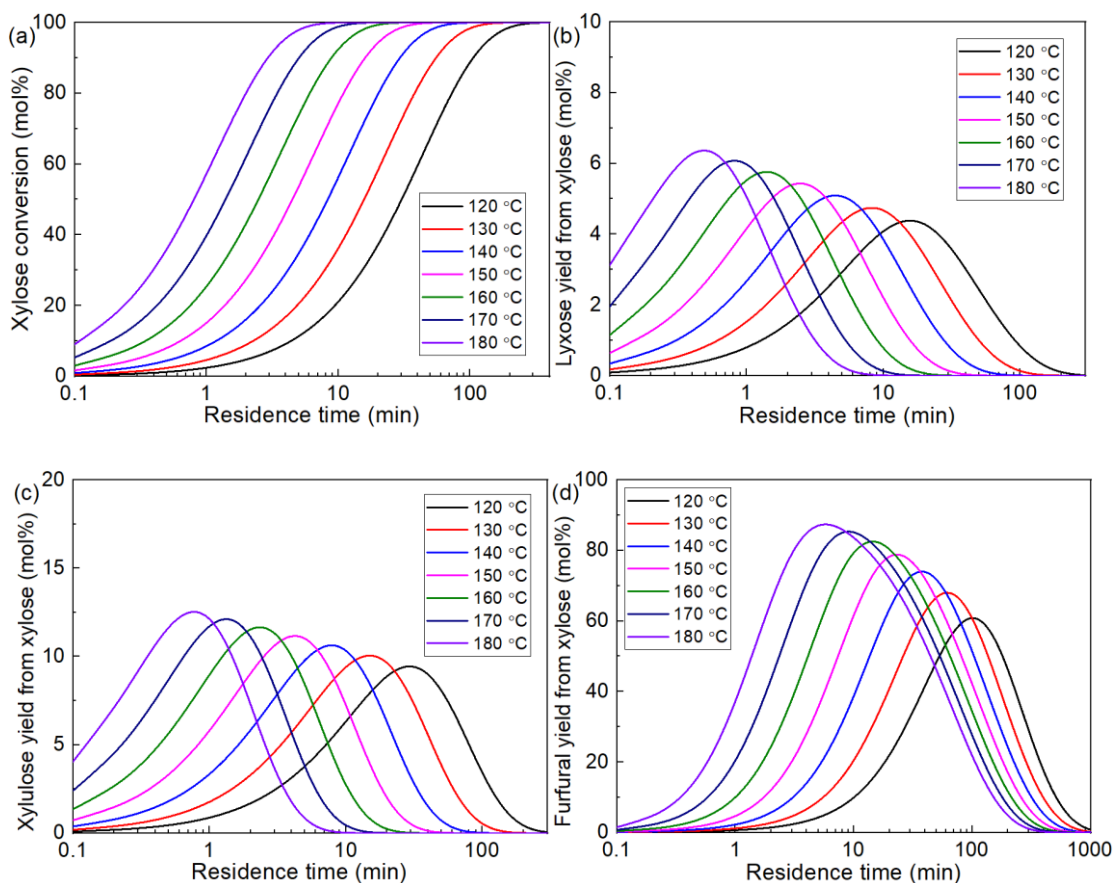

Figure S24. Effect of temperature on the  $[\text{Al}(\text{OH})_2]^+$ -catalyzed (a) xylose conversion; (b) lyxose yield; (c) xylulose yield and (d) furfural yield at varying reaction temperatures. Reaction conditions: 0.1 mM  $[\text{Al}(\text{OH})_2]^+$ , 0.5 M xylose, monophasic water.

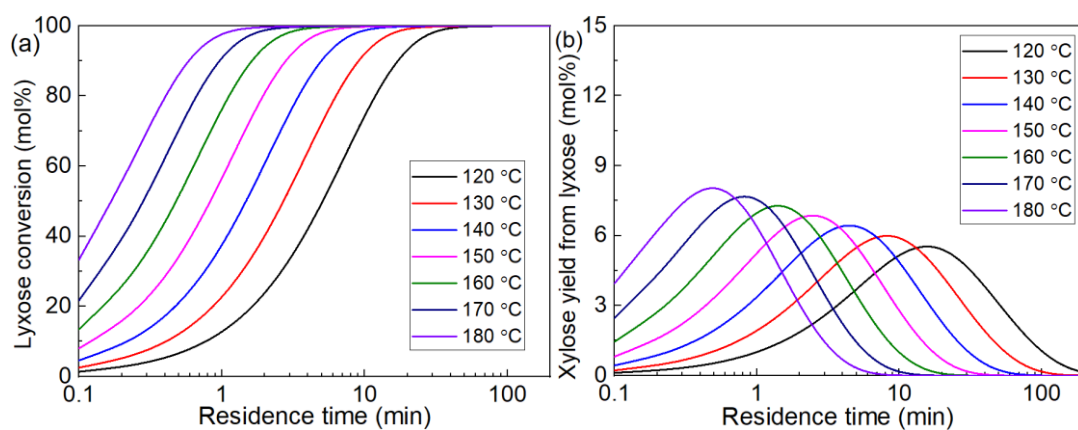

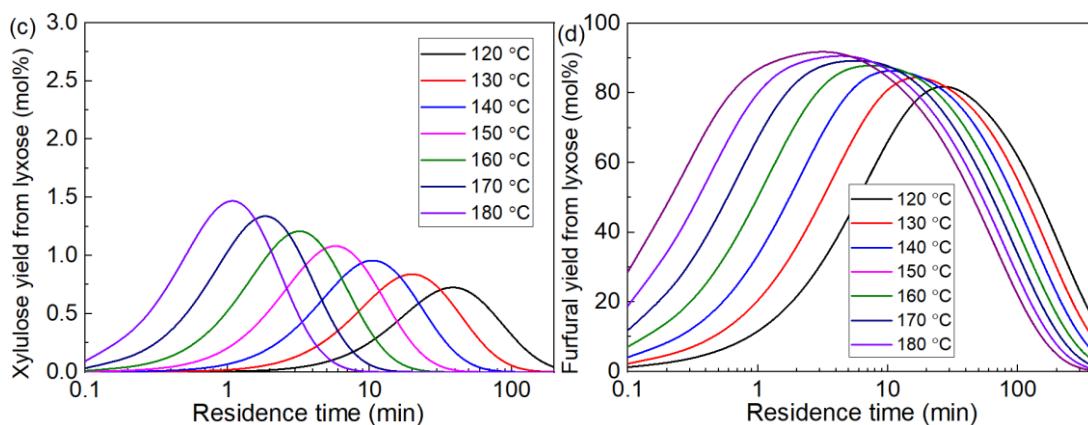

Figure S25. Effect of temperature on the  $[\text{Al}(\text{OH})_2]^+$ -catalyzed (a) lyxose conversion; (b) xylose yield; (c) xylulose yield and (d) furfural yield at varying reaction temperatures. Reaction conditions: 0.1 mM  $[\text{Al}(\text{OH})_2]^+$ , 0.5 M lyxose, monophasic water.

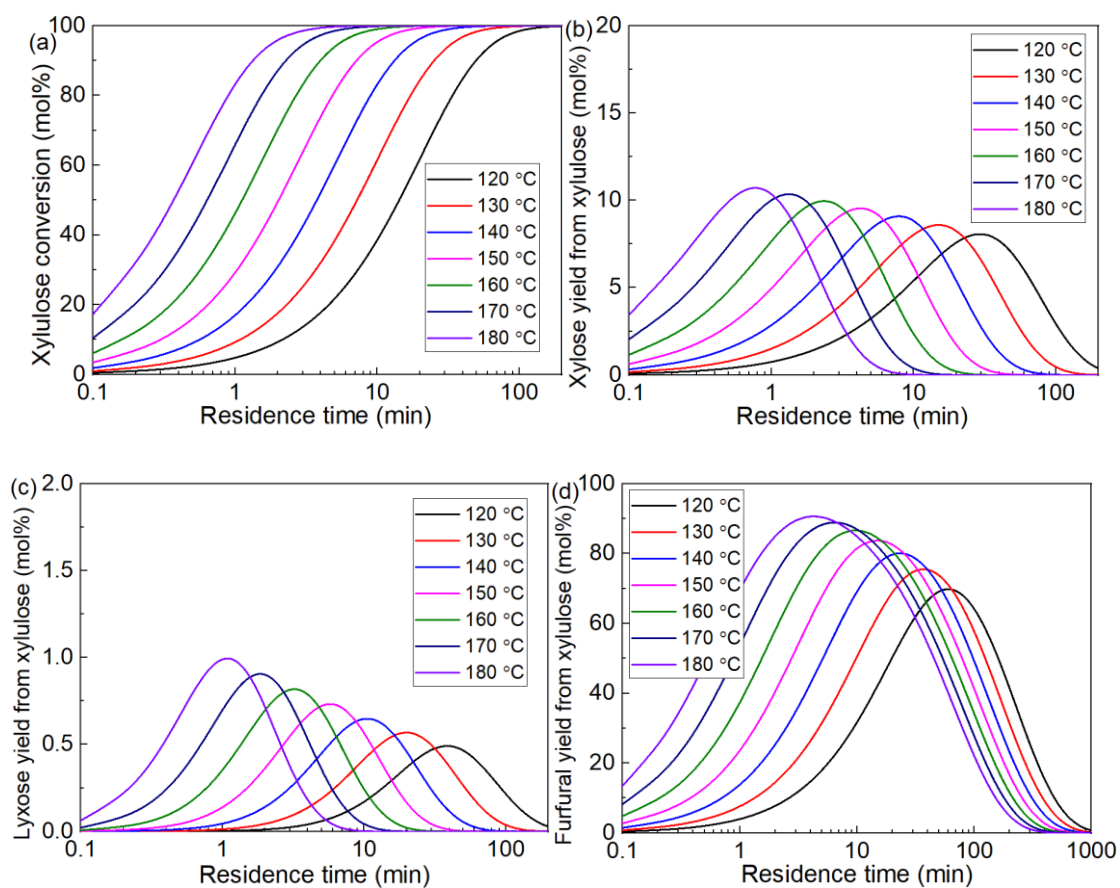

Figure S26. Effect of temperature on the  $[\text{Al}(\text{OH})_2]^+$ -catalyzed (a) xylulose conversion; (b) xylose yield; (c) lyxose yield and (d) furfural yield at varying reaction temperatures. Reaction conditions: 0.1 mM  $[\text{Al}(\text{OH})_2]^+$ , 0.5 M xylulose, monophasic water.

#### S14. Analysis of humin sources and furfural yields

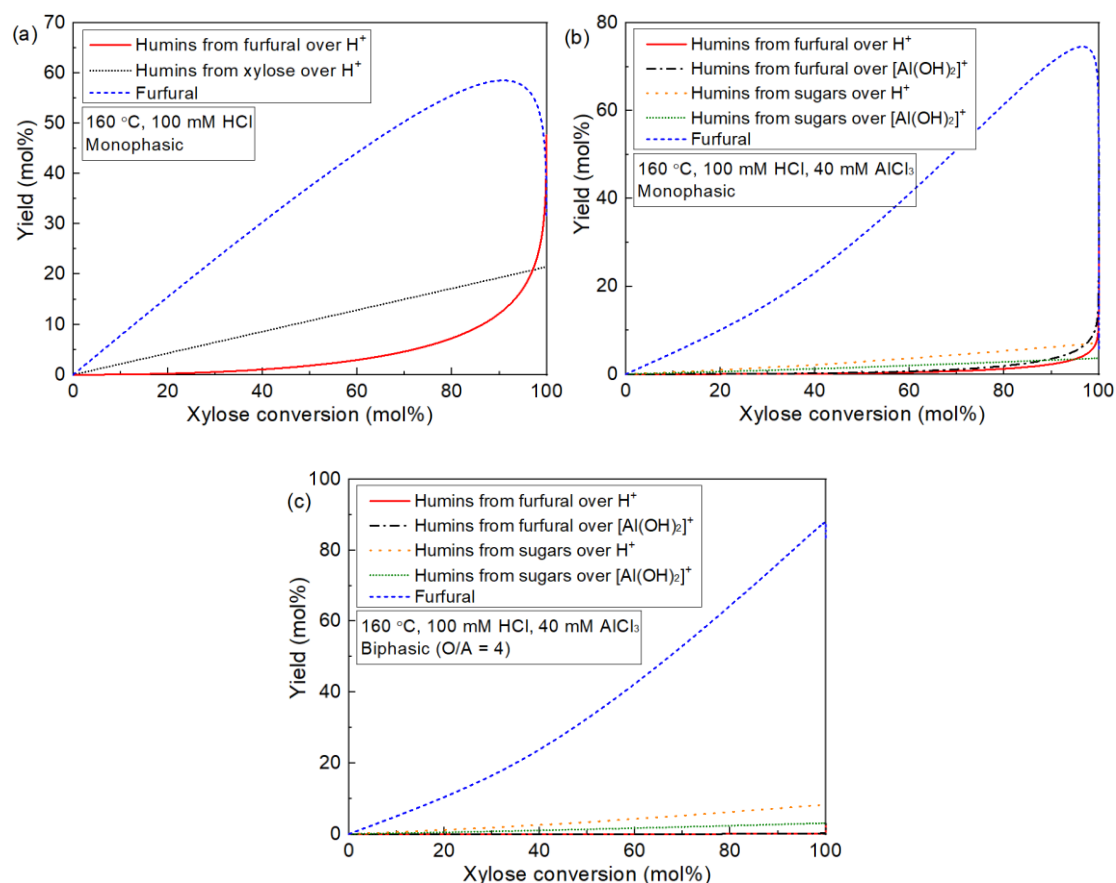

Figure S27. Analysis of humin sources and furfural yields under different conditions. (a) 100 mM HCl in monophasic water; (b) 100 mM HCl and 40 mM  $\text{AlCl}_3$  in monophasic water; and (c) 100 mM HCl and 30 mM  $\text{AlCl}_3$  in biphasic water-MIBK system. Other conditions:  $L = 3.3$  m, 160 °C, 0.1 M xylose.



### S15. Performance of literature work on furfural synthesis from xylose and their comparison with this work

Table S8. Performance on furfural synthesis from xylose in water in the literature and this work.

| No | Catalyst                                                | Solvent system     | Reactor                | $C_{\text{Xyl},0}^a$<br>(wt%) | $T^b$<br>(°C) | Time <sup>c</sup><br>(min) | $Y_{\text{Furfural}}^d$<br>(mol%) | $STY_{\text{Furfural}}^e$<br>(mol min <sup>-1</sup> m <sup>-3</sup> ) | Work                                      |
|----|---------------------------------------------------------|--------------------|------------------------|-------------------------------|---------------|----------------------------|-----------------------------------|-----------------------------------------------------------------------|-------------------------------------------|
| 1  | CO <sub>2</sub>                                         | Water/THF-MIBK     | Batch reactor          | 1.25                          | 180           | 60                         | 56.6                              | 0.037                                                                 | Morais et al. <sup>11,12</sup>            |
| 2  | Nb <sub>2</sub> O <sub>5</sub> /SBA-15                  | Water/toluene      | Batch reactor          | 2                             | 160           | 1440                       | 78                                | 0.036                                                                 | García-Sancho et al. <sup>13</sup>        |
| 3  | Arenesulfonic SBA-15                                    | Water/toluene      | Batch reactor          | 2                             | 160           | 1200                       | 80                                | 0.044                                                                 | Agirrezabal-Telleria et al. <sup>14</sup> |
| 4  | Amberlyst-70                                            | Water/toluene      | Batch reactor          | 1                             | 175           | 240                        | 54                                | 0.084                                                                 | Arias et al. <sup>15</sup>                |
| 5  | H-ZSM-5                                                 | Water/toluene      | Batch reactor          | 3                             | 140           | 240                        | 42.8                              | 0.107                                                                 | Kim et al. <sup>16</sup>                  |
| 6  | SO <sub>4</sub> <sup>2-</sup> /ZrO <sub>2</sub> /MCM-41 | Water/toluene      | Batch reactor          | 10                            | 160           | 240                        | 43                                | 0.358                                                                 | Dias et al. <sup>17</sup>                 |
| 7  | MCM-41-Nb                                               | NaCl-water/toluene | Batch reactor          | 10                            | 170           | 180                        | 59.9                              | 0.666                                                                 | García-Sancho et al. <sup>18</sup>        |
| 8  | NbP                                                     | Water/toluene      | Batch reactor          | 10                            | 210           | 60                         | 70                                | 3.241                                                                 | Pholjaroen et al. <sup>19</sup>           |
| 9  | AlCl <sub>3</sub>                                       | NaCl-water/THF     | Batch reactor          | 3.75                          | 140           | 45                         | 75                                | 1.042                                                                 | Yang et al. <sup>20</sup>                 |
| 10 | HCl                                                     | Water/MIBK         | Batch reactor          | 10                            | 170           | 30                         | 75                                | 7.408                                                                 | Weingarten et al. <sup>21</sup>           |
| 11 | H <sub>2</sub> SO <sub>4</sub>                          | Water/toluene      | Slug flow millireactor | 4                             | 190           | 2.5                        | 56                                | 19.89                                                                 | Papaioannou et al. <sup>22</sup>          |
| 12 | HCl <sup>f,g</sup>                                      | NaCl-water/MIBK    | Slug flow microreactor | 15                            | 160           | 12                         | 91.8                              | 11.87                                                                 | Guo et al. <sup>3</sup>                   |
| 13 | HCl <sup>f,g</sup>                                      | NaCl-water/MIBK    | Slug flow microreactor | 15                            | 180           | 4                          | 92.7                              | 35.96                                                                 | Guo et al. <sup>3</sup>                   |
| 14 | AlCl <sub>3</sub> +HCl <sup>g</sup>                     | Water/MIBK         | Slug flow microreactor | 15                            | 160           | 12                         | 90                                | 11.64                                                                 | This work                                 |

<sup>a</sup> Initial concentration of xylose. <sup>b</sup> Reaction temperature. <sup>c</sup> Reaction time in the batch reactor or residence time in the microreactor. <sup>d</sup> Furfural yield. <sup>e</sup> The space time yield of furfural ( $STY_{\text{Furfural}}$ ) in the batch reactor is determined by  $STY_{\text{Furfural}} = N_{\text{Xylose},0} Y_{\text{Furfural}} / (V_L t)$ , where  $N_{\text{Xylose},0}$  is the initial mole amount of xylose,  $V_L$  is the total liquid volume in the reactor and  $t$  is the reaction time. The  $STY_{\text{Furfural}}$  of furfural in the continuous flow millreactor or microreactor is calculated by  $STY_{\text{Furfural}} = \frac{Q_{\text{aq},1} C_{\text{aq,Furfural},1} + Q_{\text{org},1} C_{\text{org,Furfural},1}}{\pi (d_C / 2)^2 L_C} \times 100\%$ , where  $C_{\text{aq,Furfural},1}$  and  $C_{\text{org,furfural},1}$  are the concentrations of furfural in the aqueous and organic phase, respectively, at the reactor outlet (at ca. 20 °C),  $d_C$  and  $L_C$  are the inner diameter and length of the reactor, respectively. <sup>f</sup> With the addition of 10 wt% NaCl in the aqueous phase. <sup>g</sup> With 1 M xylose feedstock solution.

## Reference

1. W. Guo, H. J. Heeres and J. Yue, *Chemical Engineering Journal*, 2020, **381**, 122754.
2. W. Guo, Z. Zhang, J. Hacking, H. J. Heeres and J. Yue, *Chemical Engineering Journal*, 2021, **409**, 128182.
3. W. Guo, Doctoral dissertation, University of Groningen, 2021.
4. W. L. Bourcier, K. G. Knauss and K. J. Jackson, *Geochimica et cosmochimica acta*, 1993, **57**, 747-762.
5. I. Delidovich, M. S. Gyngazova, N. Sánchez-Bastardo, J. P. Wohland, C. Hoppe and P. Drabo, *Green Chemistry*, 2018, **20**, 724-734.
6. P. Aussillous and D. J. P. o. f. Quéré, *Physics of Fluids*, 2000, **12**, 2367-2371.
7. J. M. van Baten and R. Krishna, *Chemical Engineering Science*, 2004, **59**, 2535-2545.
8. D. Tsaoulidis and P. Angeli, *Chemical Engineering Journal*, 2015, **262**, 785-793.
9. M. N. Kashid, I. Gerlach, S. Goetz, J. Franzke, J. F. Acker, F. Platte, D. W. Agar and S. Turek, *Industrial & Engineering Chemistry Research*, 2005, **44**, 5003-5010.
10. T. Shimanouchi, Y. Kataoka, T. Tanifuji, Y. Kimura, S. Fujioka and K. Terasaka, *AIChE Journal*, 2016, **62**, 2135-2143.
11. A. R. C. Morais, M. D. D. J. Matuchaki, J. Andraus and R. Bogel-Lukasik, *Green Chemistry*, 2016, **18**, 2985-2994.
12. A. R. C. Morais and R. Bogel-Lukasik, *Green Chemistry*, 2016, **18**, 2331-2334.
13. C. García-Sancho, I. Agirrezabal-Telleria, M. B. Güemez and P. Maireles-Torres, *Applied Catalysis B: Environmental*, 2014, **152-153**, 1-10.
14. I. Agirrezabal-Telleria, J. Requies, M. B. Güemez and P. L. Arias, *Applied Catalysis B: Environmental*, 2014, **145**, 34-42.
15. I. Agirrezabal-Telleria, A. Larreategui, J. Requies, M. B. Güemez and P. L. Arias, *Bioresource Technology*, 2011, **102**, 7478-7485.
16. S. B. Kim, S. J. You, Y. T. Kim, S. Lee, H. Lee, K. Park and E. D. Park, *Korean Journal of Chemical Engineering*, 2011, **28**, 710-716.
17. A. S. Dias, S. Lima, M. Pillinger and A. A. Valente, *Catalysis Letters*, 2007, **114**, 151-160.

18. C. García-Sancho, I. Sádaba, R. Moreno-Tost, J. Mérida-Robles, J. Santamaría-González, M. López-Granados and P. Maireles-Torres, *ChemSusChem*, 2013, **6**, 635-642.
19. B. Pholjaroen, N. Li, Z. Wang, A. Wang and T. Zhang, *Journal of Energy Chemistry*, 2013, **22**, 826-832.
20. Y. Yang, C.-W. Hu and M. M. Abu-Omar, *ChemSusChem*, 2012, **5**, 405-410.
21. R. Weingarten, J. Cho, J. W. C. Conner and G. W. Huber, *Green Chemistry*, 2010, **12**, 1423-1429.
22. M. Papaioannou, R. J. T. Kleijwegt, J. van der Schaaf and M. F. Neira d'Angelo, *Industrial & Engineering Chemistry Research*, 2019, **58**, 16106-16115.
